# Supplementary material for: The role of phonons in switchable MOFs: a model material perspective
Source: Royal Society of Chemistry journal article supplement (doi:10.1039/d3ta02214e), 2023-01-01
Supplement: d3ta02214e1.pdf [file d3ta02214e1.pdf]

## Supporting Information for

# **The role of phonons in switchable MOFs: A model material perspective**

Alexander E. J. Hoffman,<sup>a, †</sup> Irena Senkowska,<sup>\*, b, †</sup> Leila Abylgazina,<sup>b</sup> Volodymyr Bon,<sup>b</sup> Veronika Grzimek,<sup>c</sup> Anna Maria Dominic,<sup>d</sup> Margarita Russina,<sup>c</sup> Marvin A. Kraft,<sup>e</sup> Inez Weidinger,<sup>e</sup> Wolfgang G. Zeier,<sup>e</sup> Veronique Van Speybroeck,<sup>\*, a</sup> Stefan Kaskel<sup>\*, b</sup>

# 1. Samples characterization

## 1.1 Samples overview

Table S1. Overview of the samples used in the study.

|                                                 | XRD           | N <sub>2</sub><br>physisorption<br>isotherms | SEM              | Crystal width<br>range(mean), μm |
|-------------------------------------------------|---------------|----------------------------------------------|------------------|----------------------------------|
| <b>Samples for inelastic neutron scattering</b> |               |                                              |                  |                                  |
| <i>Macro-sized crystals</i>                     |               |                                              |                  |                                  |
| DUT-8(Ni)                                       | Figure S1b,c  | Figure S2a                                   | Figure S3a       | 7 - 43 (17)                      |
| DUT-8(Co)                                       | Figure S1b,c  | Figure S2a                                   | Figure S3b       | 9 - 25 (15)                      |
| DUT-8(Cu)                                       | Figure S1a    | Figure S2b                                   | Figure S3c       | 4 - 19 (10)                      |
| <i>Submicron-sized crystals</i>                 |               |                                              |                  |                                  |
| DUT-8(Ni)                                       | Figure S1a    | Figure S2b                                   | Figure S3d       | 0.04 - 0.08 (0.06)               |
| DUT-8(Co)                                       | Figure S1a    | Figure S2b                                   | Figure S3e       | 0.045 - 0.193 (0.106)            |
| <b>Samples for acoustic phonon spectroscopy</b> |               |                                              |                  |                                  |
| <i>Macro-sized crystals</i>                     |               |                                              |                  |                                  |
| DUT-8(Ni)                                       | Figure S4 a-c | -                                            | Figure S5a       | 4 - 10 (7)                       |
| DUT-8(Co)                                       | Figure S4 a-c | -                                            | Figures S5b, S6a | 18 - 104 (50)                    |
| DUT-8(Zn)                                       | Figure S4 a-c | -                                            | Figures S5c, S6b | 82 - 243 (152)                   |
| <b>Sample for raman spectroscopy</b>            |               |                                              |                  |                                  |
| <i>Macro-sized crystals</i>                     |               |                                              |                  |                                  |
| DUT-8(Cu)                                       | Figure S7a    | -                                            | Figure S7b       | 9 - 44 (17)                      |

## 1.2 Samples used for INS

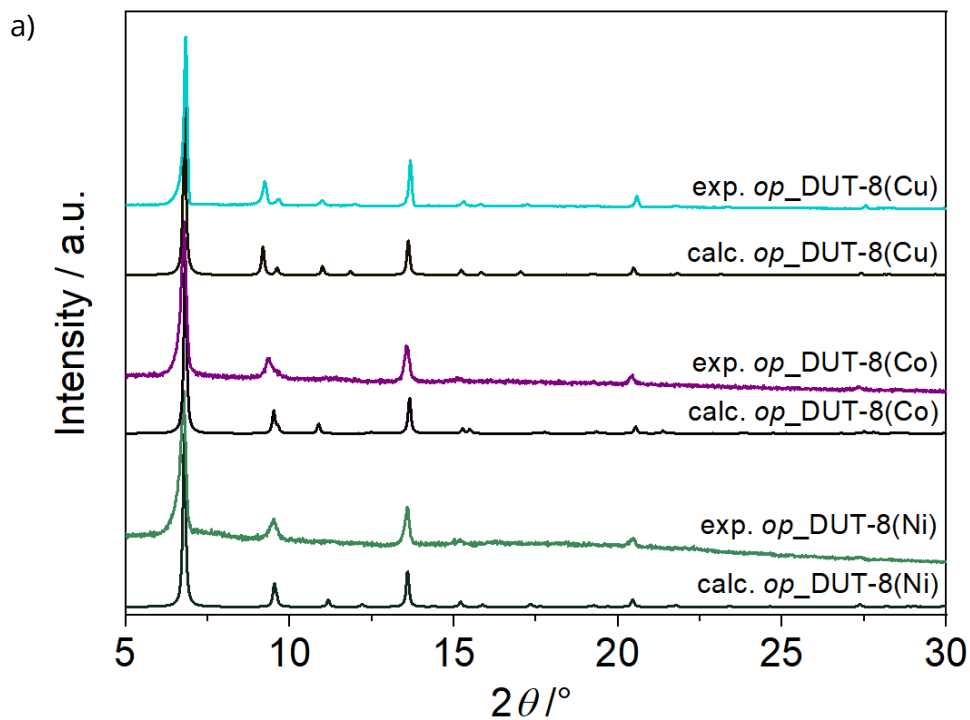

Figure S1: a) PXRD patterns of desolvated macro-sized DUT-8(Cu)<sub>op</sub>, desolvated submicron-sized DUT-8(Co)<sub>op</sub> and DUT-8(Ni)<sub>op</sub> in comparison with patterns of DUT-8(M)<sub>op</sub> phases calculated from the single crystal structures.

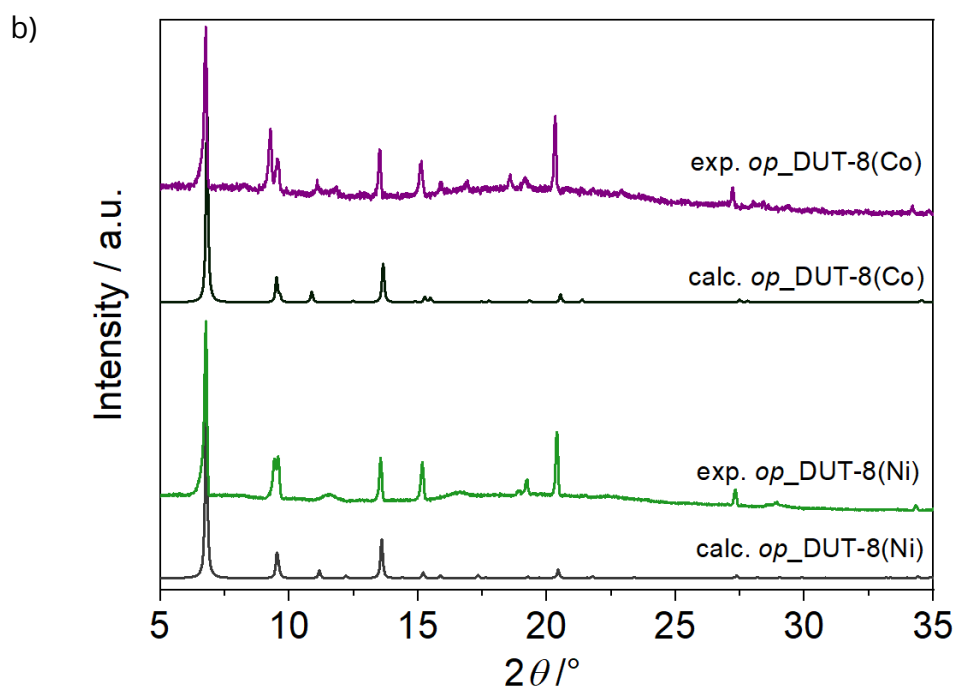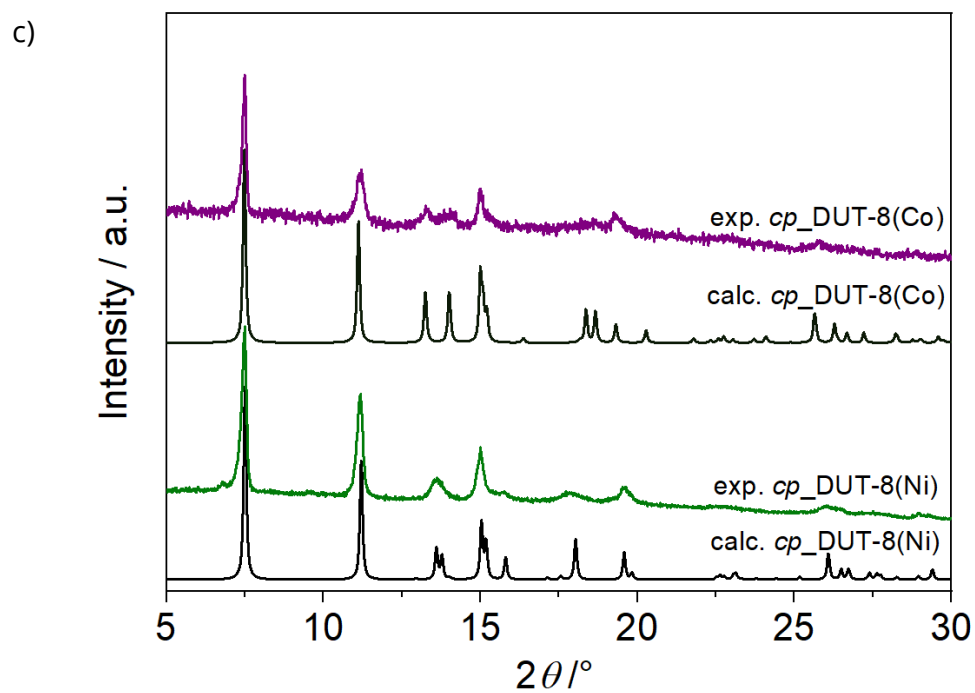

Figure S1: PXRD patterns of DUT-8(M), M = Ni, Co: b) solvated macro-sized samples (*op*) and c) desolvated macro-sized samples (*cp*) in comparison with patterns calculated from the DUT-8(M) crystal structures.



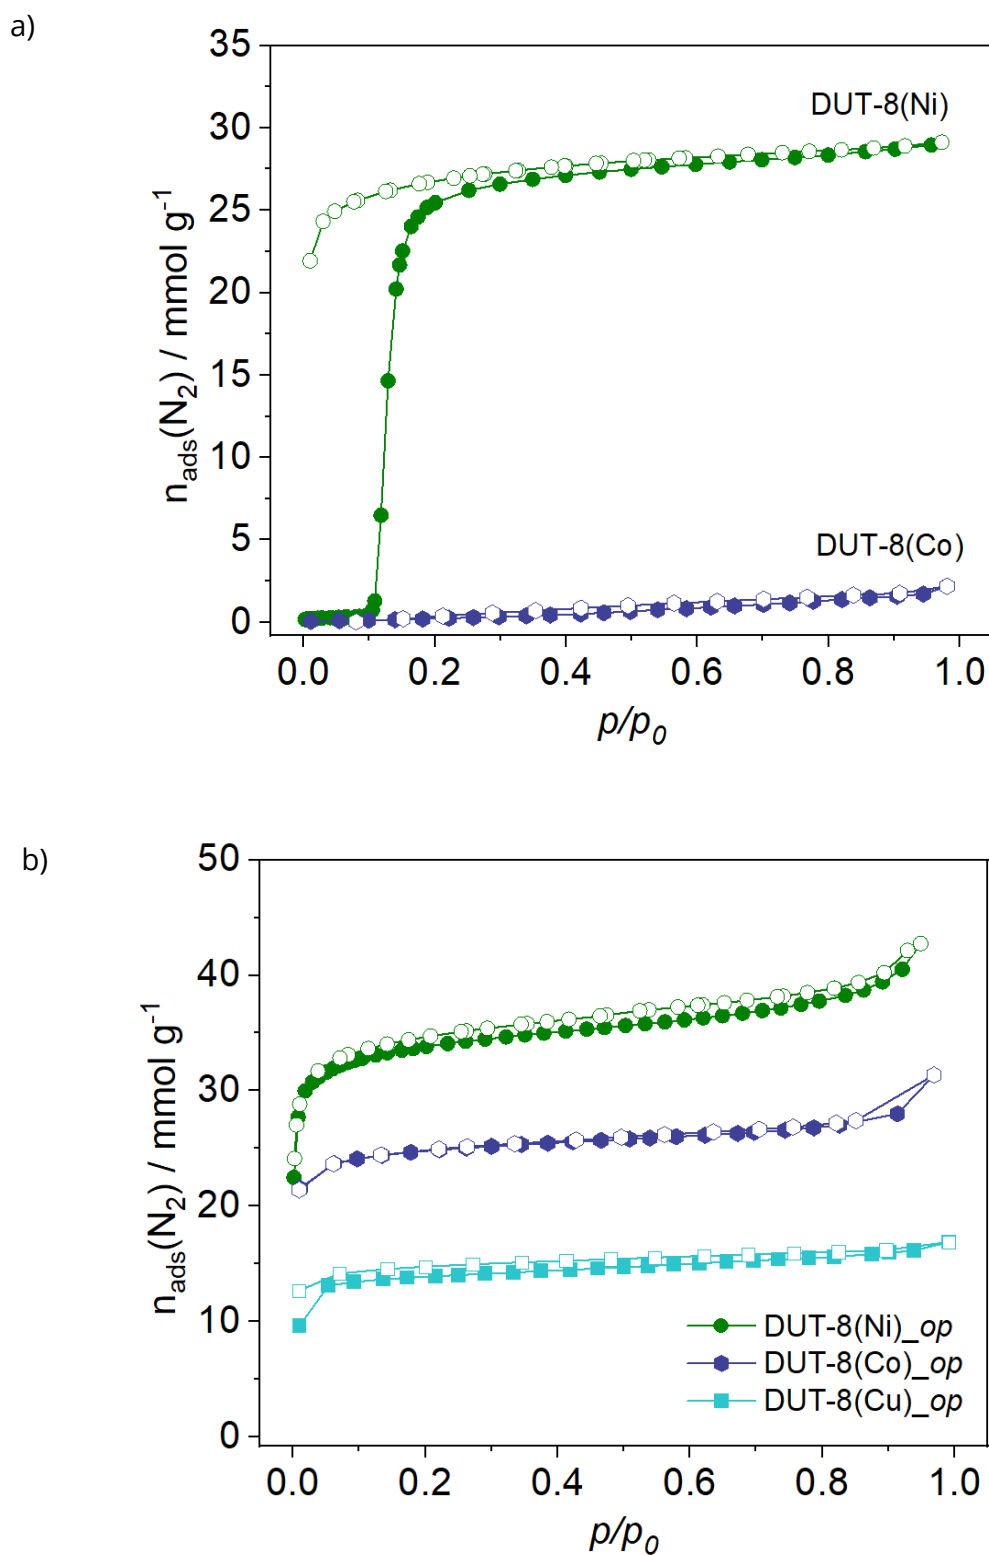

Figure S2: Nitrogen adsorption isotherms of a) DUT-8(M)<sub>cp</sub> and b) DUT-8(M)<sub>op</sub> samples.  $M = \text{Ni, Co, Cu}$ .

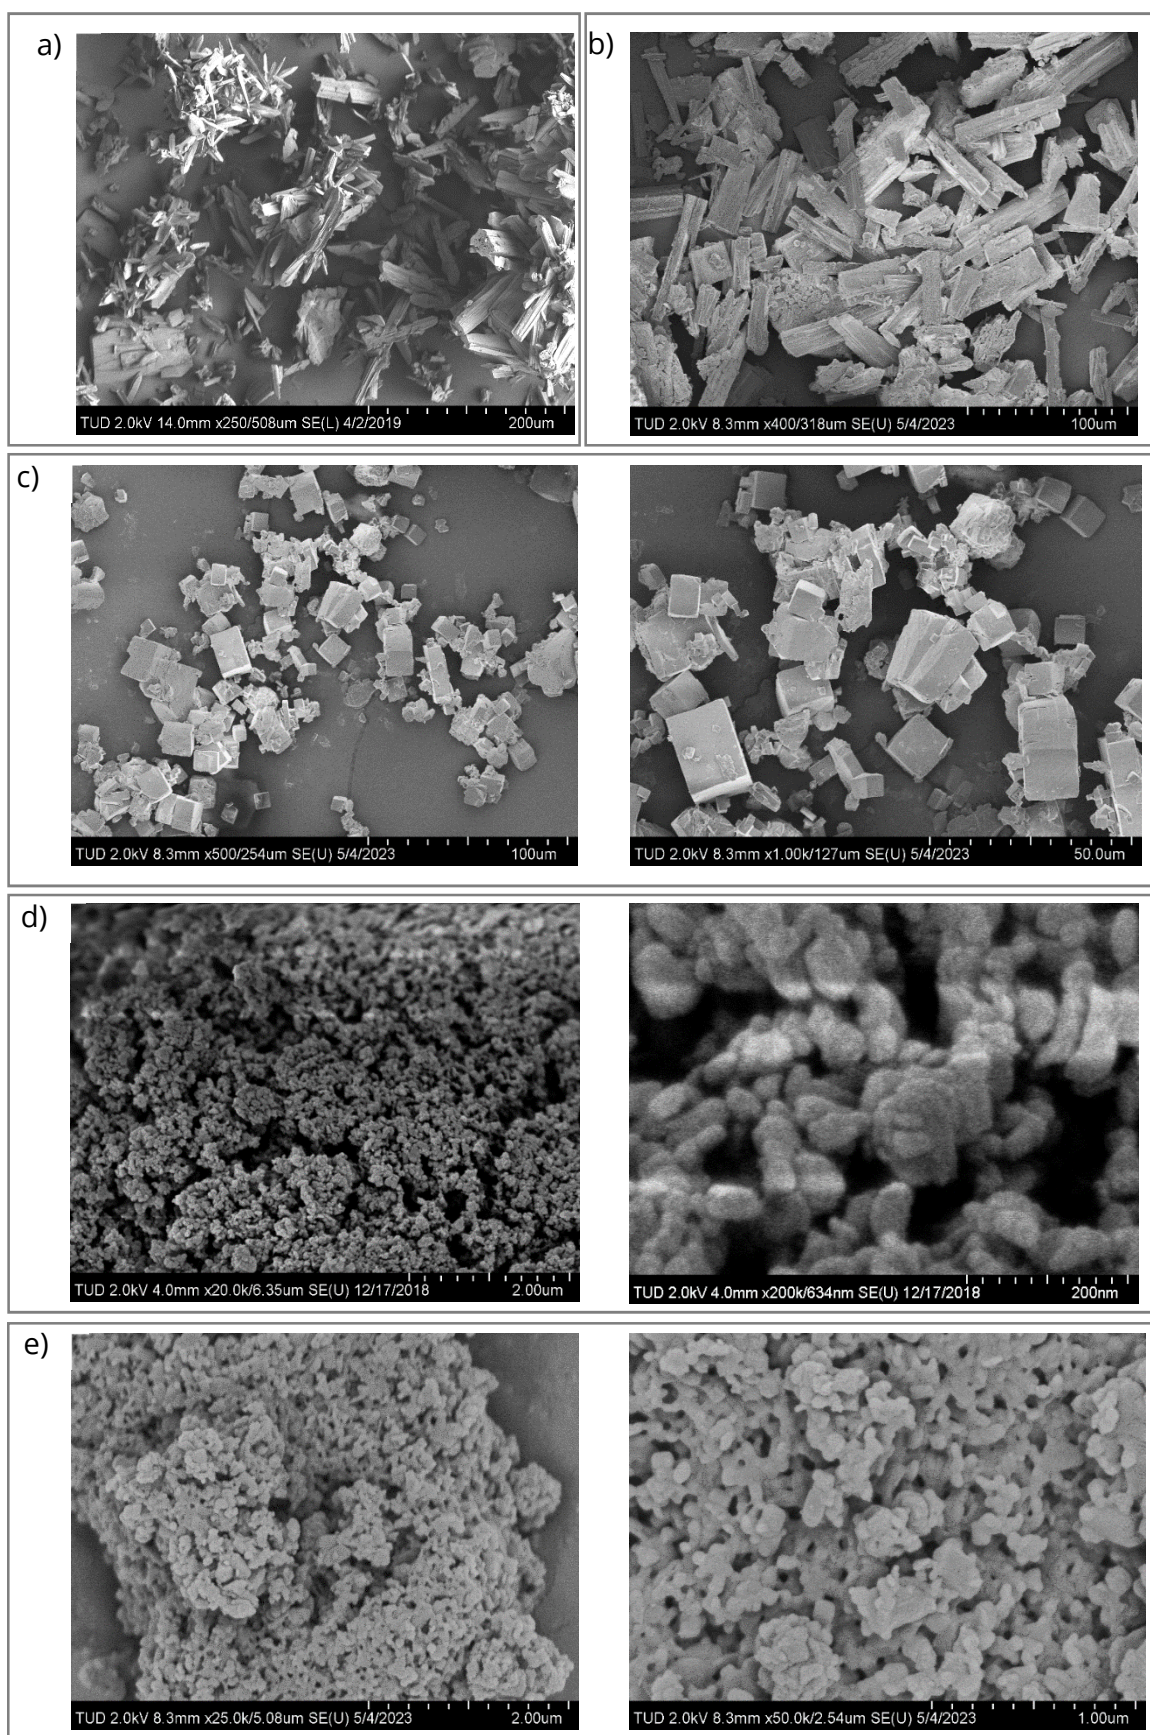

Figure S3: SEM images of desolvated macro-sized crystals: a) DUT-8(Ni); b) DUT-8(Co); c) DUT-8(Cu); and submicron-sized crystals: d) DUT-8(Ni); e) DUT-8(Co).

## 1.2 Samples used for phonon acoustic spectroscopy

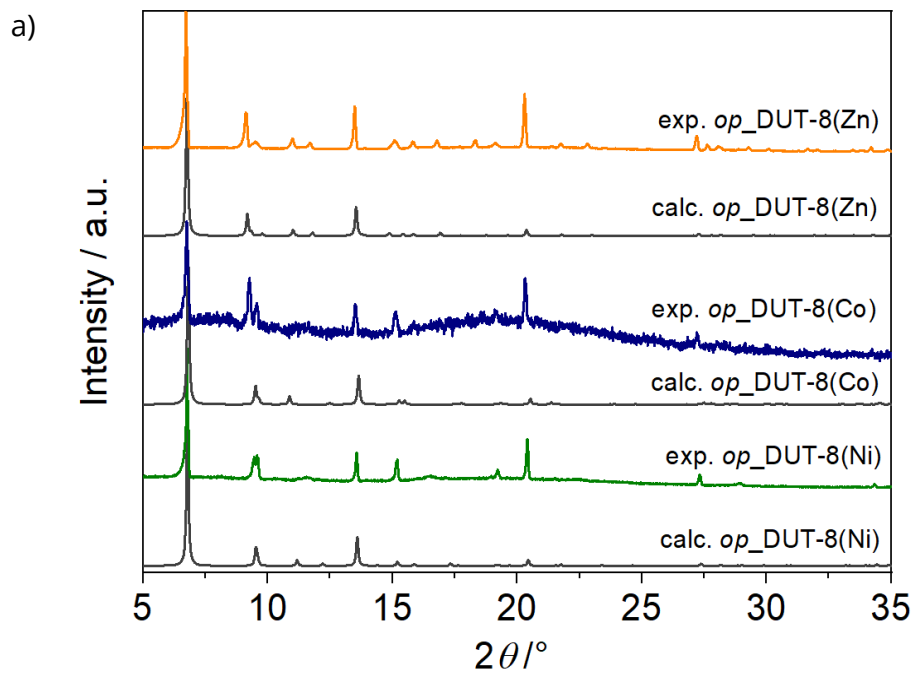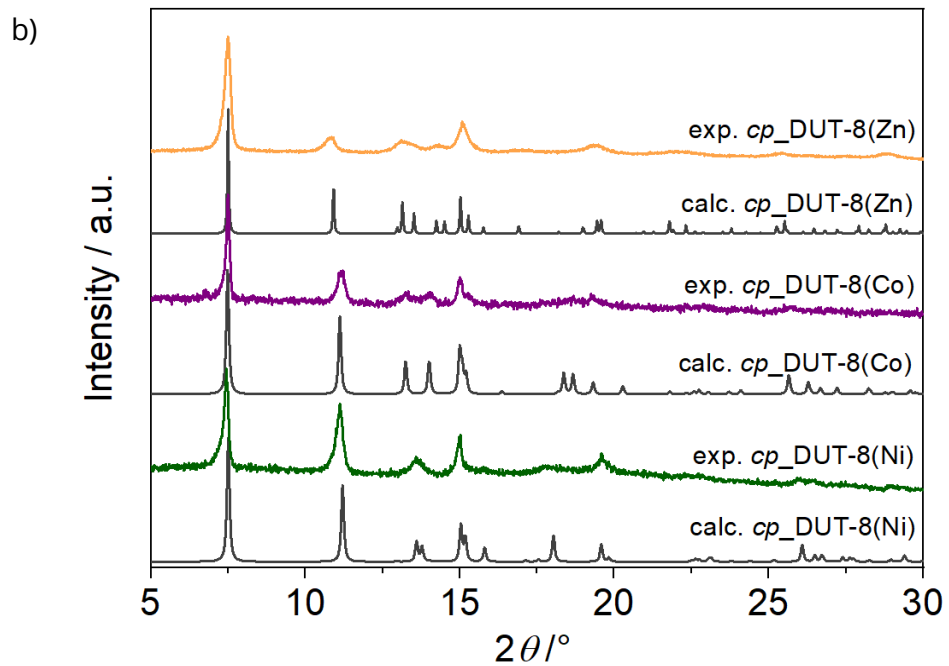

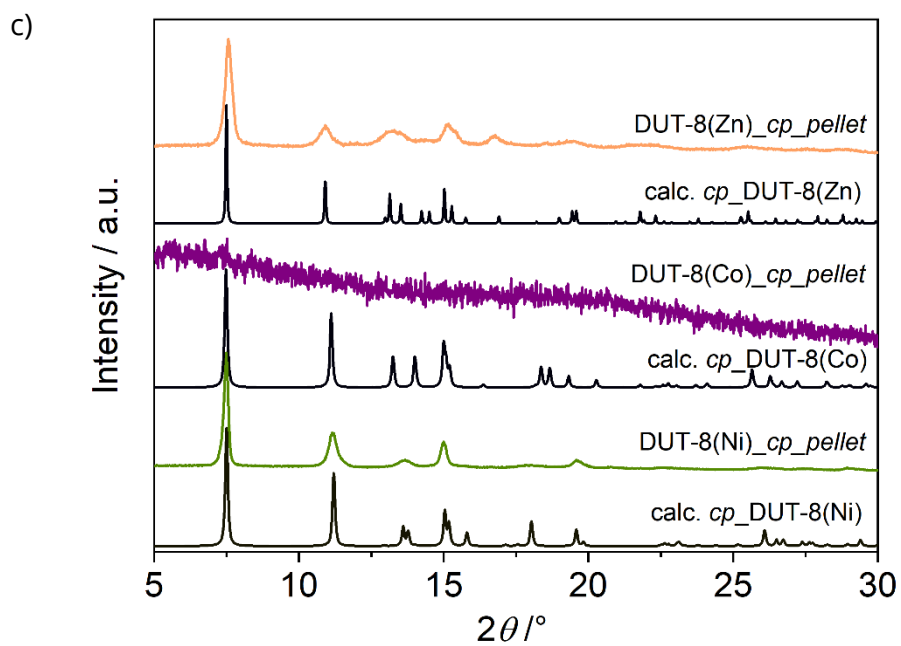

Figure S4: PXRD patterns of the macro-sized DUT-8(M) (M = Ni, Co, Zn) crystals: a) solvated in DMF (*op*); b) desolvated (*cp*); c) pelletised for phonon acoustic spectroscopy.



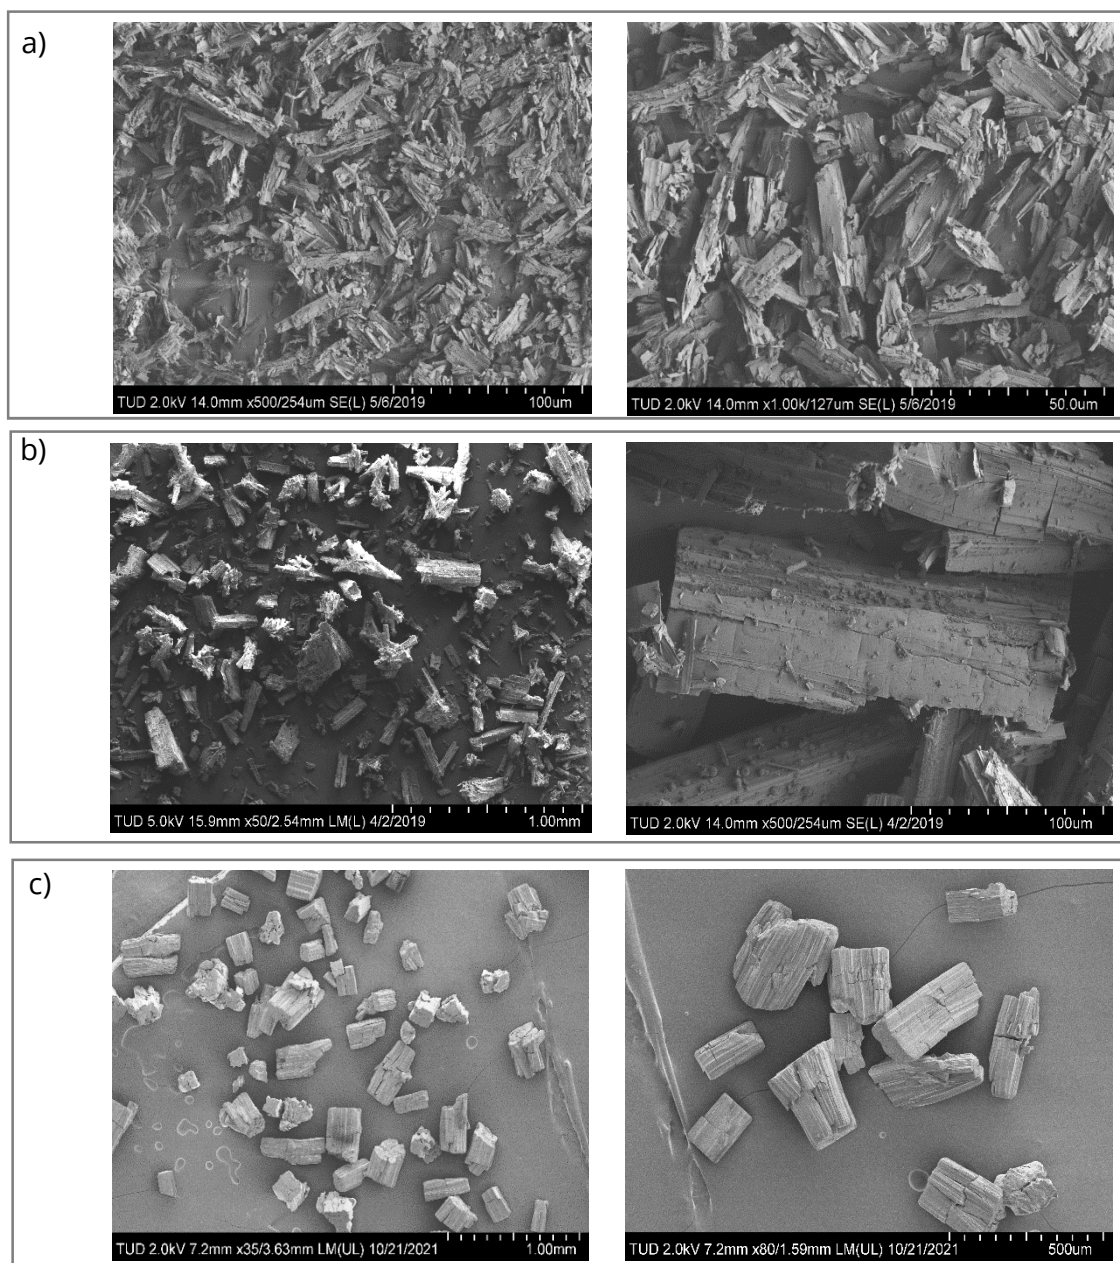

Figure S5: SEM images of desolvated macro-sized crystals: a) DUT-8(Ni); b) DUT-8(Co); c) DUT-8(Zn).



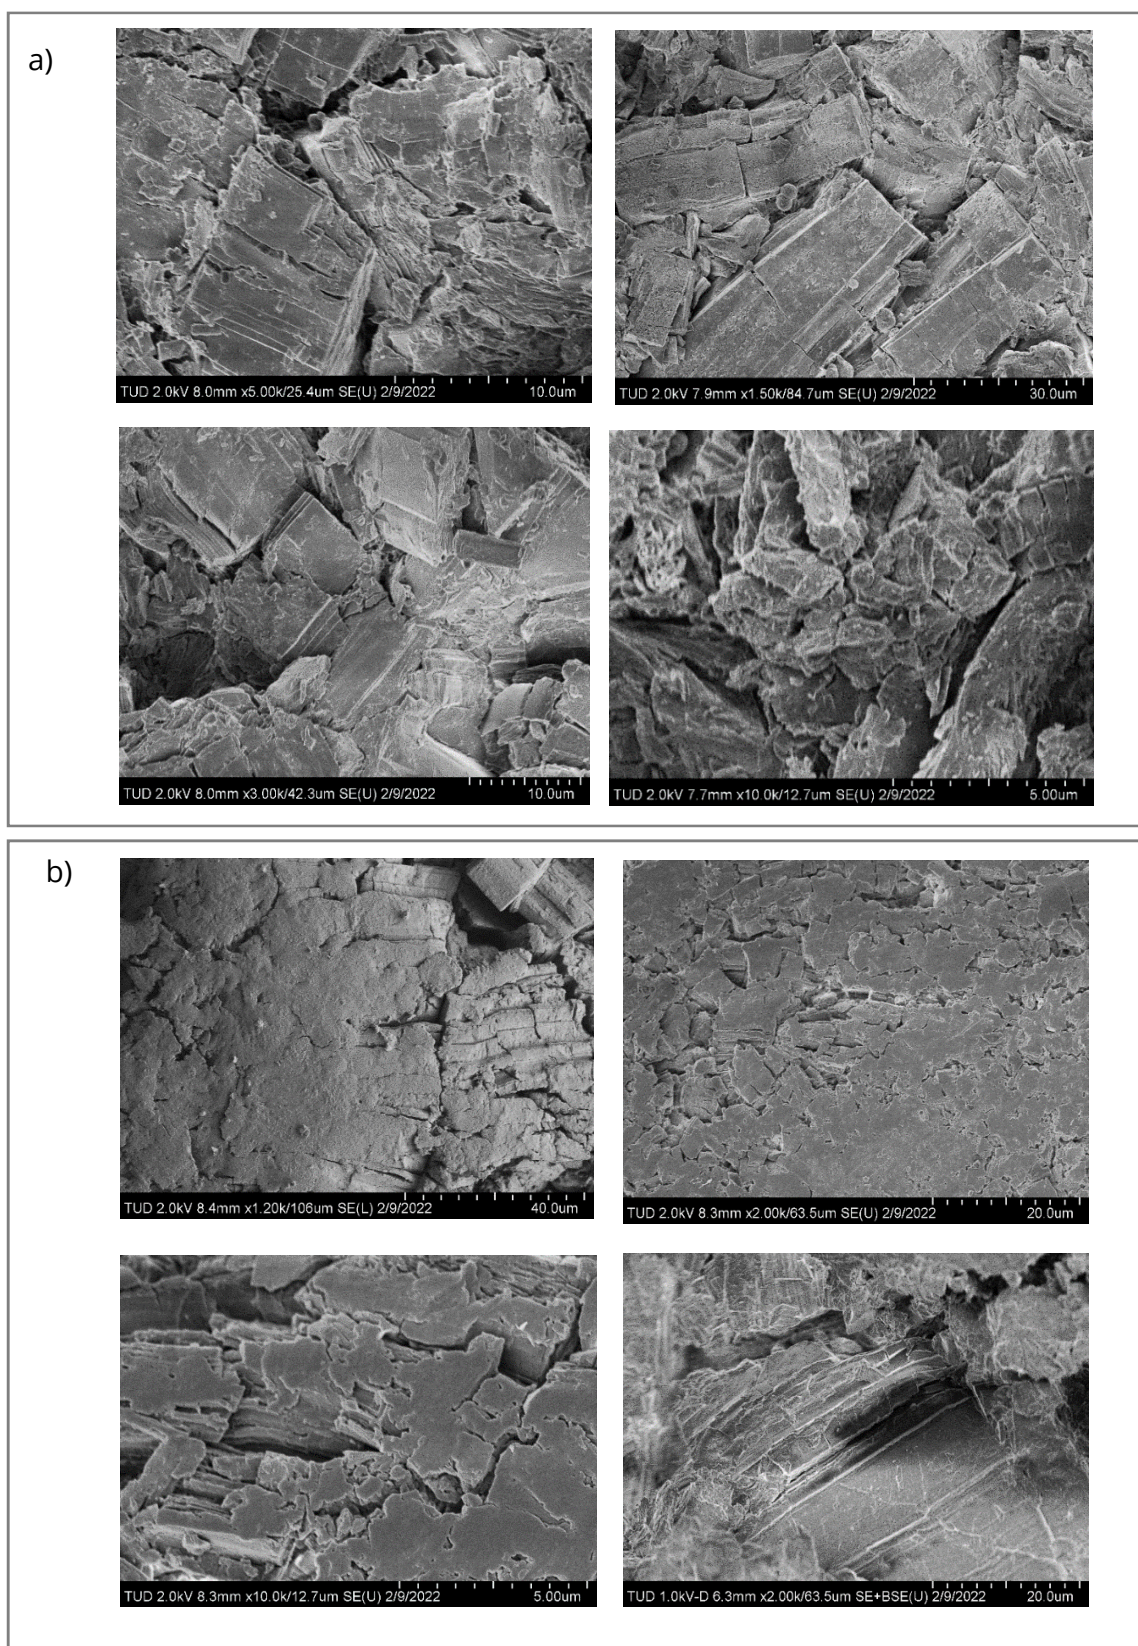

Figure S6: SEM images of a) DUT-8(Co) pellet, b) DUT-8(Zn) pellet.

### 1.3 Sample used for Raman spectroscopy

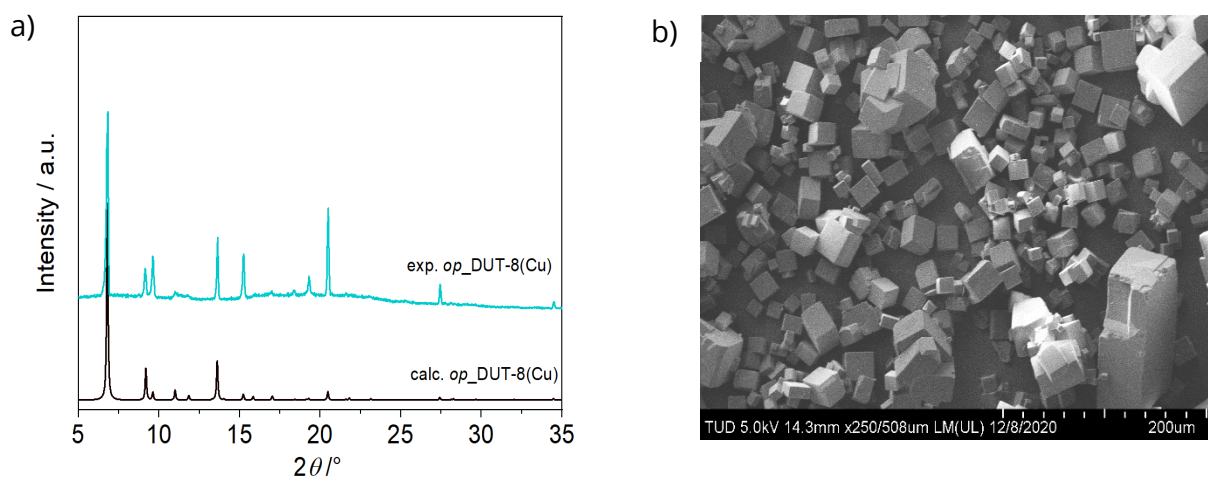

Figure S7: a) PXRD pattern of solvated macro-sized crystals (*op*) of DUT-8(Cu) in comparison with pattern calculated from the DUT-8(Cu) single crystal structure; b) SEM image of DUT-8(Cu).

## 2. Optimised structural parameters from static DFT calculations

### 2.1. Open pore phases

Table S2: Experimental crystallographic data for DUT-8(M)<sub>op</sub> phases solvated with DMF crystallising in *C2/m* space group\* and structural parameters of the theoretically optimised DUT-8(M) materials in the solvent-free op state.

|                                | Experiment<br>DUT-8(Ni)<br>CCDC<br>1912198             | Theory<br>DUT-8(Ni)                                                                                  | Experiment<br>DUT-8(Co)<br>CCDC<br>1912199                | Theory<br>DUT-8(Co)                                                                                 | Experiment<br>DUT-8(Zn)<br>CCDC<br>2020029             | Theory<br>DUT-8(Zn)                                                                                 | Experiment<br>DUT-8(Cu)<br>CCDC<br>2189425             | Theory<br>DUT-8(Cu)                                                                                 |
|--------------------------------|--------------------------------------------------------|------------------------------------------------------------------------------------------------------|-----------------------------------------------------------|-----------------------------------------------------------------------------------------------------|--------------------------------------------------------|-----------------------------------------------------------------------------------------------------|--------------------------------------------------------|-----------------------------------------------------------------------------------------------------|
| Unit cell<br>parameters / Å, ° | $a=18.470$<br>$b=18.390$<br>$c=9.311$<br>$\beta=98.72$ | $a = 18.40$<br>$b = 18.83$<br>$c = 9.24$<br>$\alpha = 90.91$<br>$\beta = 103.41$<br>$\gamma = 90.02$ | $a=18.720$<br>$b=18.340$<br>$c=9.490$<br>$\beta = 101.77$ | $a = 18.71$<br>$b = 18.68$<br>$c = 9.43$<br>$\alpha = 90.96$<br>$\beta = 99.27$<br>$\gamma = 89.98$ | $a=19.000$<br>$b=18.070$<br>$c=9.670$<br>$\beta=95.87$ | $a = 18.76$<br>$b = 18.59$<br>$c = 9.56$<br>$\alpha = 90.73$<br>$\beta = 99.26$<br>$\gamma = 90.01$ | $a=18.510$<br>$b=18.370$<br>$c=9.680$<br>$\beta=96.31$ | $a = 18.67$<br>$b = 18.41$<br>$c = 9.64$<br>$\alpha = 90.43$<br>$\beta = 98.48$<br>$\gamma = 89.97$ |
| Cell volume/ Å <sup>3</sup>    | 3125                                                   | 3113                                                                                                 | 3190                                                      | 3251                                                                                                | 3303                                                   | 3290                                                                                                | 3272                                                   | 3277                                                                                                |
| M...M distance/<br>Å           | 2.653                                                  | 2.49                                                                                                 | 2.691                                                     | 2.26                                                                                                | 2.966                                                  | 2.80                                                                                                | 2.678                                                  | 2.55                                                                                                |
| M–N bond<br>length/ Å          | 2.042                                                  | 2.11                                                                                                 | 2.111                                                     | 2.29                                                                                                | 2.084                                                  | 2.10                                                                                                | 2.231                                                  | 2.26                                                                                                |
| M–M–N angle/ °                 | 177.6                                                  | 166                                                                                                  | 171.8                                                     | 175                                                                                                 | 178.7                                                  | 177                                                                                                 | 178.9                                                  | 178                                                                                                 |

\* The unit cell of the *op* phase contains 4 metal atoms, four 2,6-ndc and two dabco molecules.

### 2.2. Closed pore phases

Table S3: Crystallographic data for DUT-8(M)<sub>cp</sub>\* crystallising in *P1* space group and structural parameters of the theoretically optimised DUT-8(M) materials in the cp phase.

|                             | Experiment<br>DUT-8(Ni)<br>1034317                                                                       | Theory<br>DUT-8(Ni)                                                                                 | Experiment<br>DUT-8(Co)<br>1912233                                                                      | Theory<br>DUT-8(Co)                                                                                 | Experiment<br>DUT-8(Zn)<br>2020030                                                                               | Theory<br>DUT-8(Zn)                                                                                 | Theory<br>DUT-8(Cu)                                                                                 |
|-----------------------------|----------------------------------------------------------------------------------------------------------|-----------------------------------------------------------------------------------------------------|---------------------------------------------------------------------------------------------------------|-----------------------------------------------------------------------------------------------------|------------------------------------------------------------------------------------------------------------------|-----------------------------------------------------------------------------------------------------|-----------------------------------------------------------------------------------------------------|
| Cell parameters /<br>Å, °   | $a = 6.947$<br>$b = 8.181$<br>$c = 12.172$<br>$\alpha = 91.141$<br>$\beta = 103.87$<br>$\gamma = 104.55$ | $a = 6.84$<br>$b = 23.89$<br>$c = 9.22$<br>$\alpha = 90.10$<br>$\beta = 122.59$<br>$\gamma = 90.83$ | $a = 7.045$<br>$b = 8.298$<br>$c = 12.140$<br>$\alpha = 81.24$<br>$\beta = 102.22$<br>$\gamma = 105.56$ | $a = 6.89$<br>$b = 23.92$<br>$c = 9.36$<br>$\alpha = 88.87$<br>$\beta = 123.92$<br>$\gamma = 92.60$ | $a = 7.1279$<br>$b = 8.5505$<br>$c = 13.1270$<br>$\alpha = 84.1477$<br>$\beta = 116.0322$<br>$\gamma = 108.4626$ | $a = 6.92$<br>$b = 23.80$<br>$c = 9.57$<br>$\alpha = 89.49$<br>$\beta = 123.44$<br>$\gamma = 95.53$ | $a = 6.89$<br>$b = 23.75$<br>$c = 9.54$<br>$\alpha = 90.61$<br>$\beta = 123.91$<br>$\gamma = 93.16$ |
| Cell volume/ Å <sup>3</sup> | 648                                                                                                      | 1270                                                                                                | 665                                                                                                     | 1279                                                                                                | 681                                                                                                              | 1306                                                                                                | 1292                                                                                                |
| M...M distance/ Å           | 2.736                                                                                                    | 2.59                                                                                                | 2.636                                                                                                   | 2.48                                                                                                | 3.80                                                                                                             | 2.97                                                                                                | 2.63                                                                                                |
| M–N bond<br>length/ Å       | 1.906<br>2.086                                                                                           | 2.09                                                                                                | 2.15(9)<br>2.13(9)                                                                                      | 2.19                                                                                                | 2.293<br>2.098                                                                                                   | 2.08                                                                                                | 2.13<br>2.24                                                                                        |
| M–M–N angle/ °              | 153.93                                                                                                   | 158                                                                                                 | 141.50                                                                                                  | 162                                                                                                 | 117.31                                                                                                           | 160                                                                                                 | 168                                                                                                 |

\* The unit cell of the *cp* phase contains two metal atom, two 2,6-ndc and one dabco molecule. For the theoretical calculations, the unit cell is doubled compared to the experimental unit cell to have consistent calculations between *cp* and *op* phases.



### 3. Visualisation of experimental and theoretically optimised crystal structures

#### 3.1. Open pore phases of DUT-8(M)

##### 3.1.1. DUT-8(Ni)

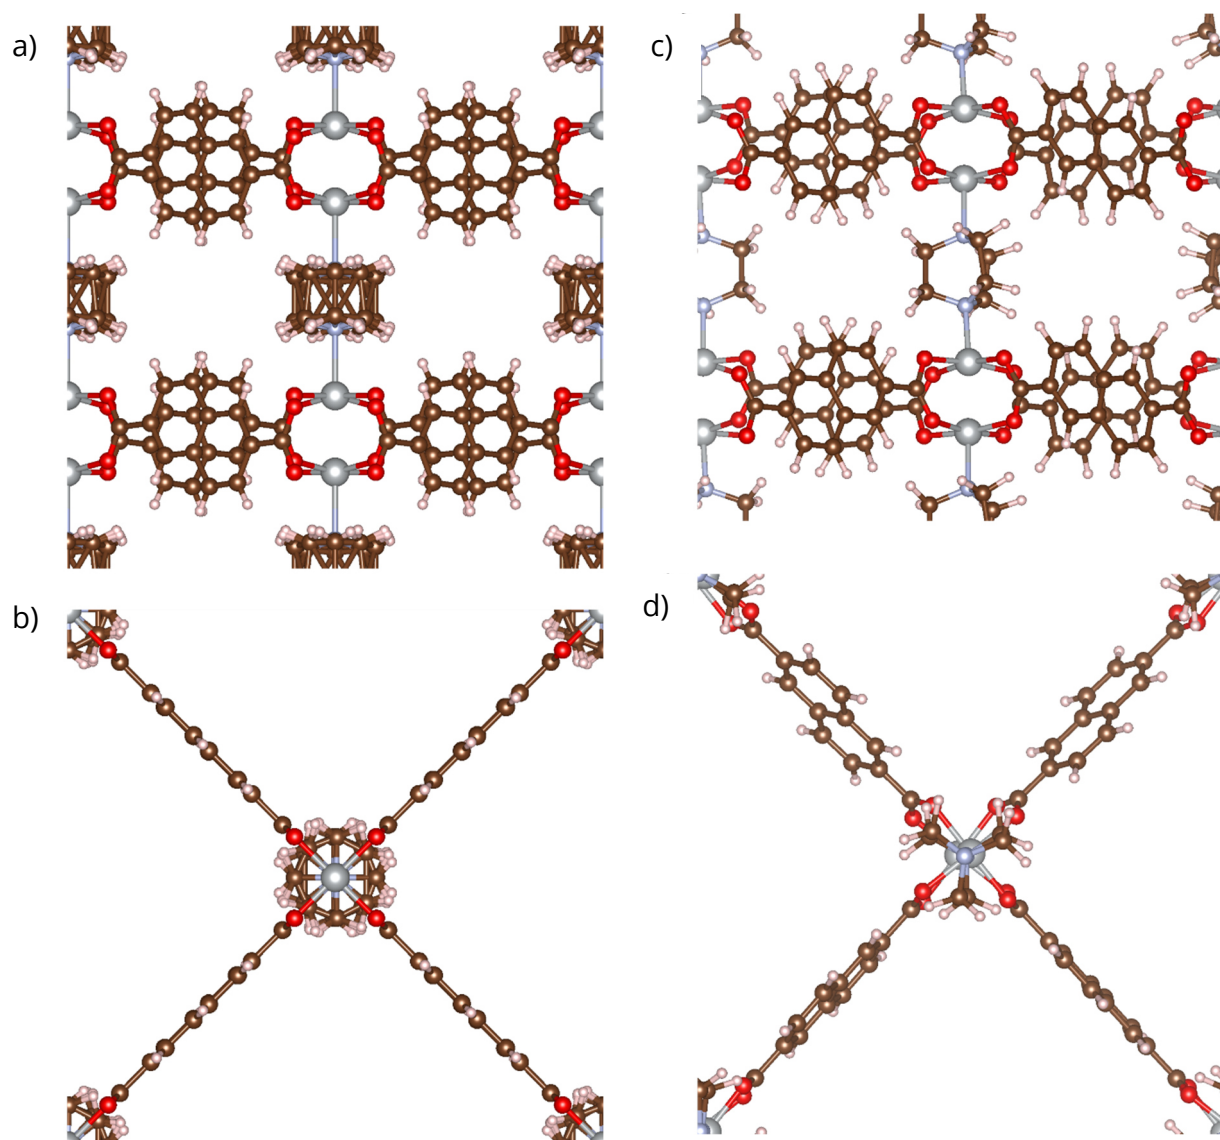

Figure S8: Visualisation of the experimental (a, b) and theoretically optimised (c, d) op phase structure of DUT-8(Ni). (a, c) View on the 1D chain with dabco pillars and paddle wheel unit and the linker stacking. (b, d) View along the pore channel.

### 3.1.2. DUT-8(Co)

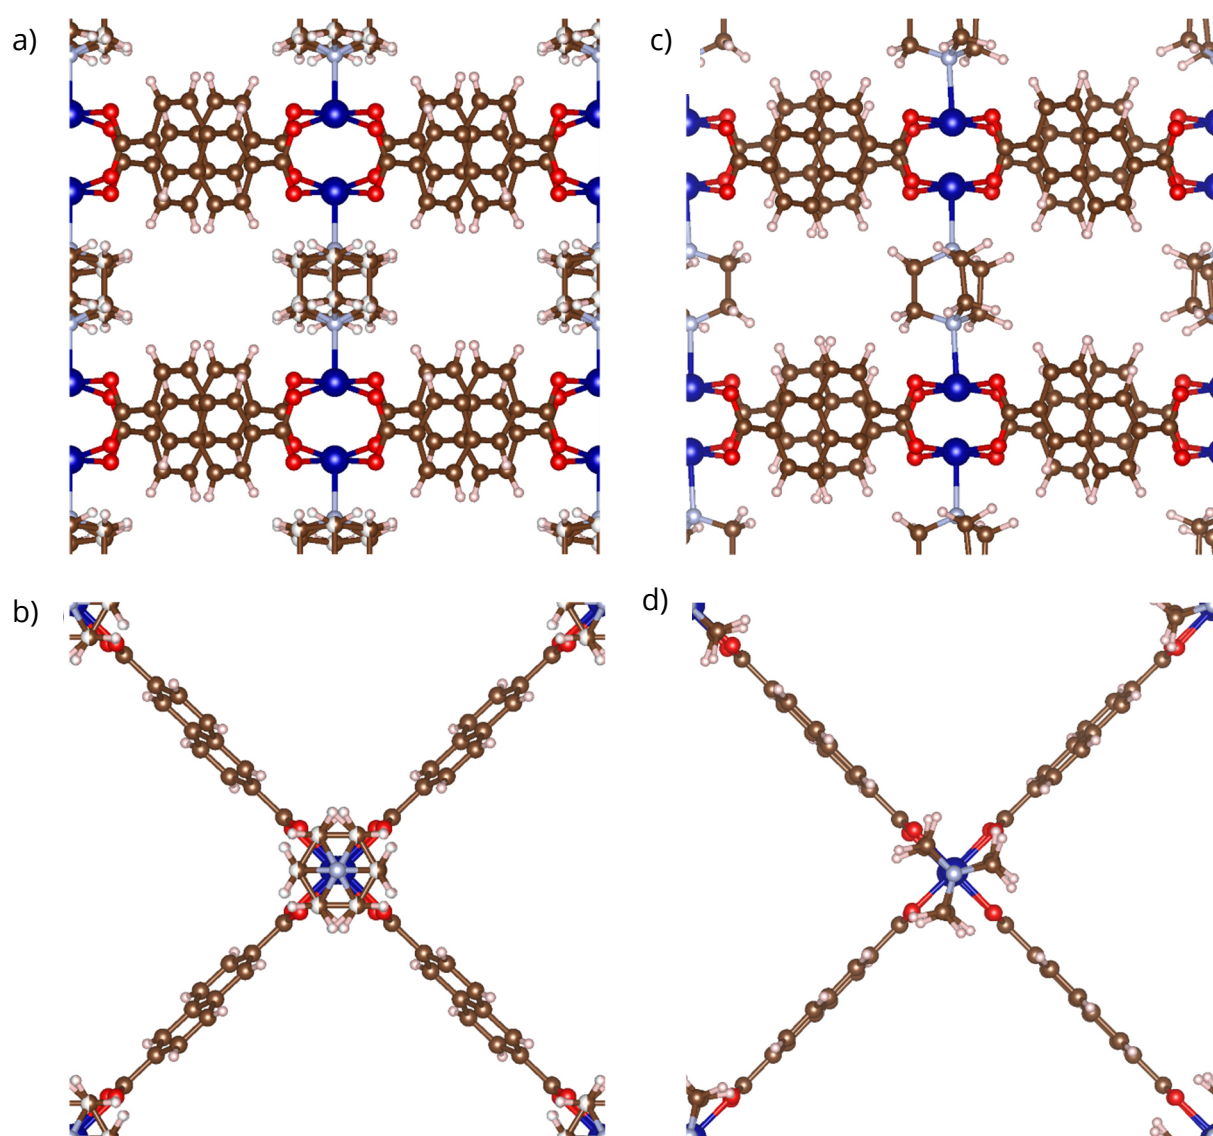

Figure S9: Visualisation of the experimental (a, b) and theoretically optimised (c, d) op phase structure of DUT-8(Co). (a, c) View on the 1D chain with dabco pillars and paddle wheel unit and the linker stacking. (b, d) View along the pore channel.

### 3.1.3. DUT-8(Zn)

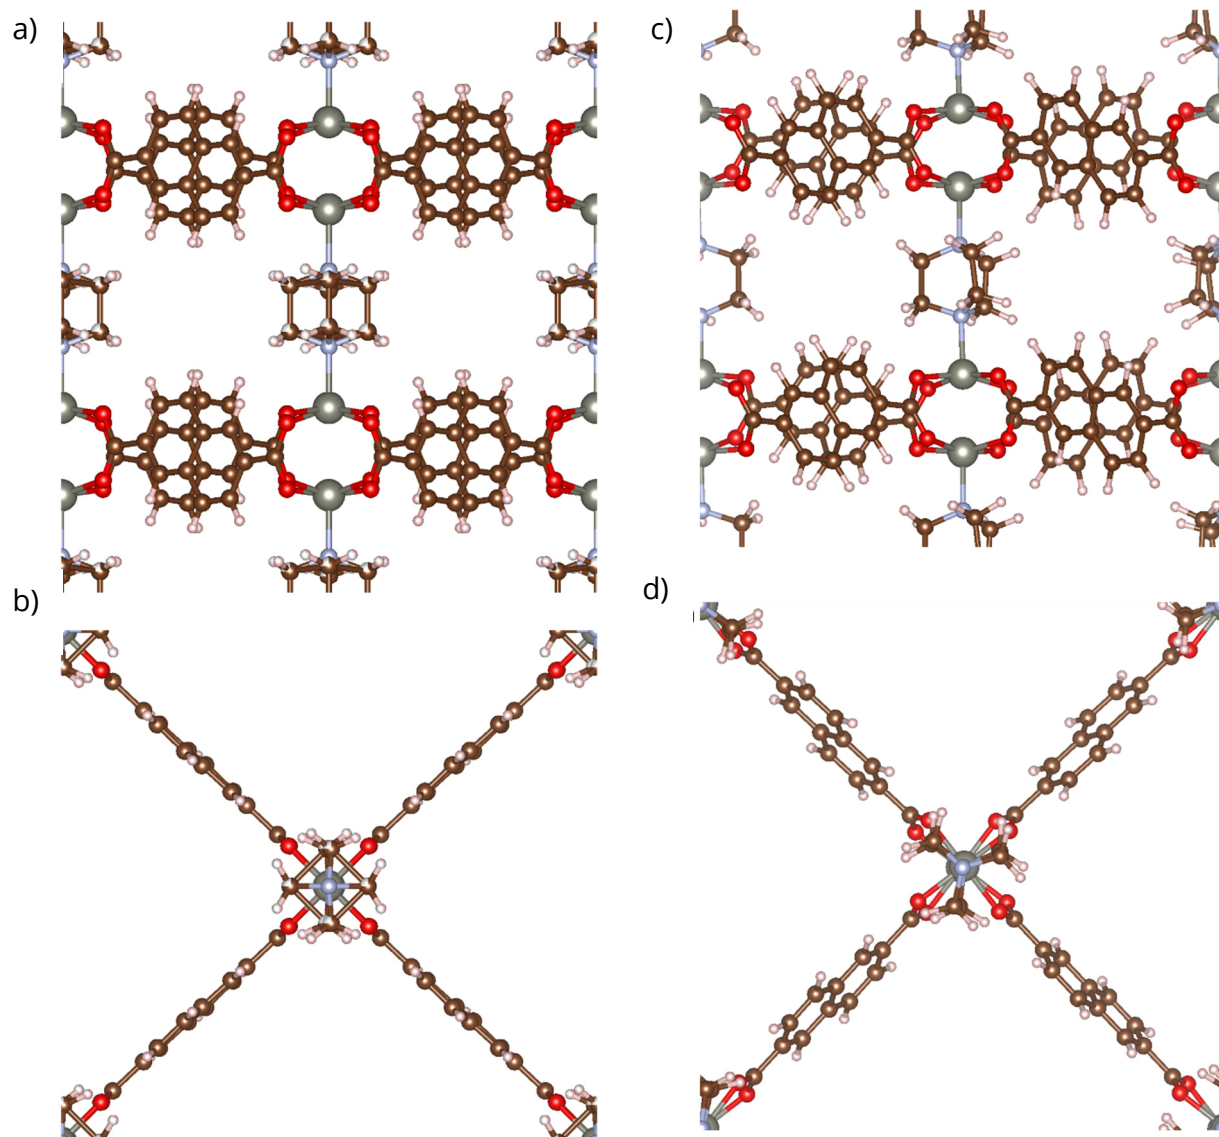

Figure S10: Visualisation of the experimental (a, b) and theoretically optimised (c, d) op phase structure of DUT-8(Zn). (a, c) View on the 1D chain with dabco pillars and paddle wheel unit and the linker stacking. (b, d) View along the pore channel.

### 3.1.4. DUT-8(Cu)

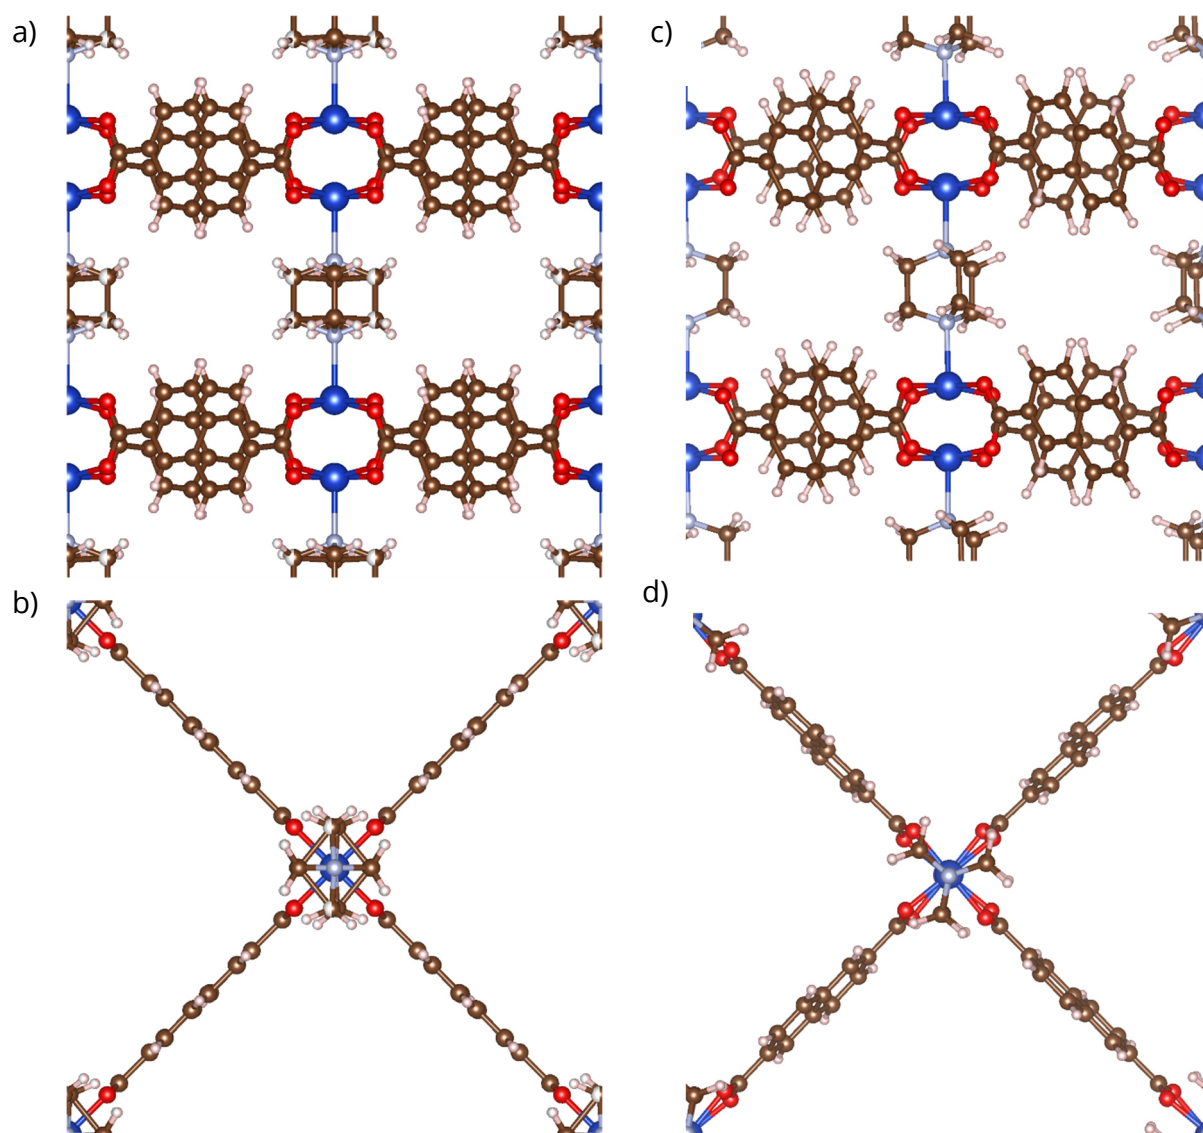

Figure S11: Visualisation of the experimental (a, b) and theoretically optimised (c, d) *op* phase structure of DUT-8(Cu). (a, c) View on the 1D chain with dabco pillars and paddle wheel unit and the linker stacking. (b, d) View along the pore channel.



## 3.2. Closed pore phases of DUT-8(M)

### 3.2.1. DUT-8(Ni)

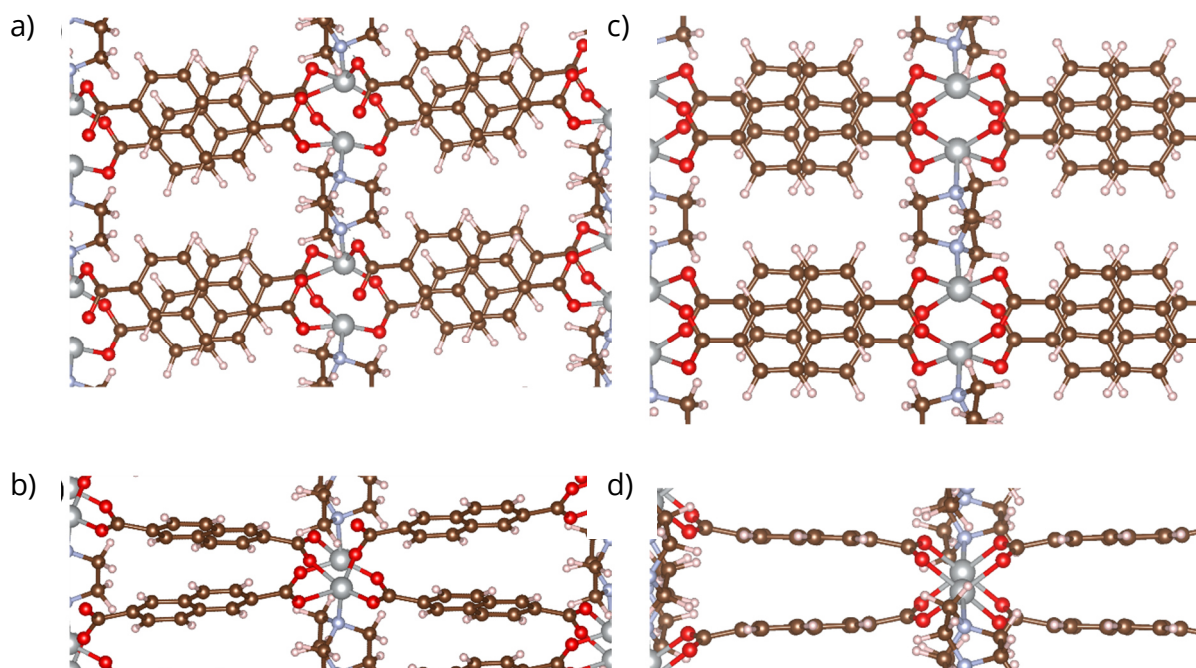

Figure S12: Visualisation of the experimental (a, b) and theoretically optimised (c, d) *cp* phase structure of DUT-8(Ni). (a, c) View on the 1D chain with dabco pillars and paddle wheel unit and the linker stacking. (b, d) View *along* the pore channel.

### 3.2.2. DUT-8(Co)

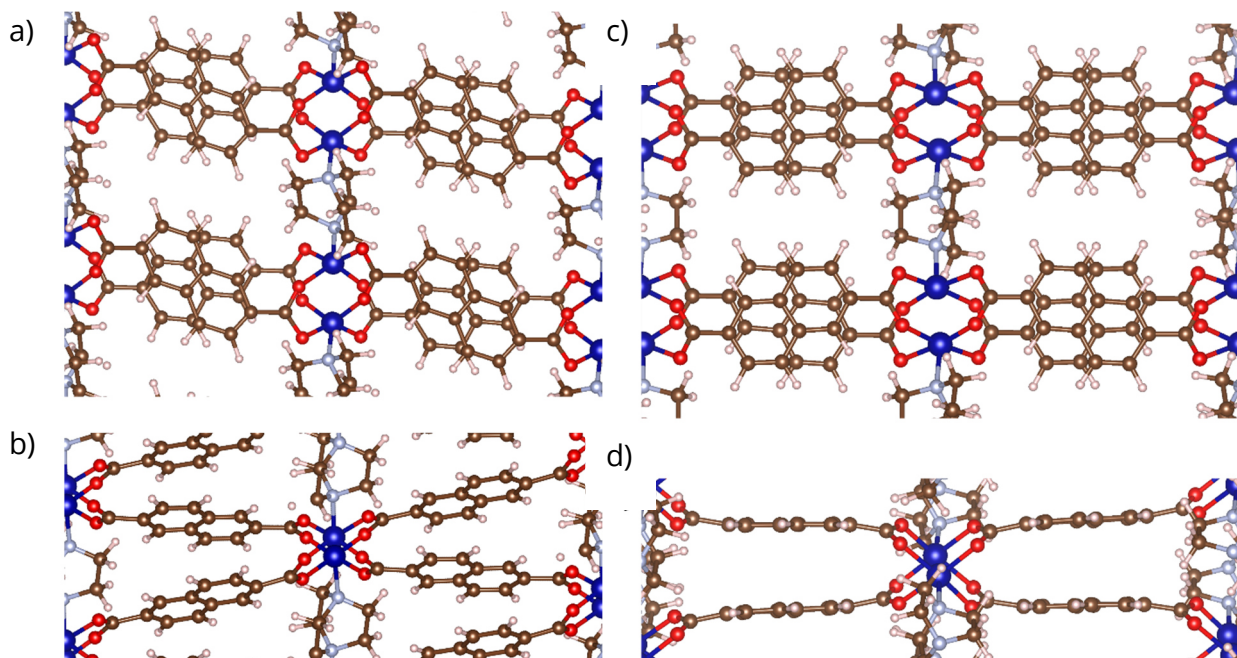

Figure S13: Visualisation of the experimental (a, b) and theoretically optimised (c, d) *cp* phase structure of DUT-8(Co). (a, c) View on the 1D chain with dabco pillars and paddle wheel unit and the linker stacking. (b, d) View *along* the pore channel.

### 3.2.3. DUT-8(Zn)

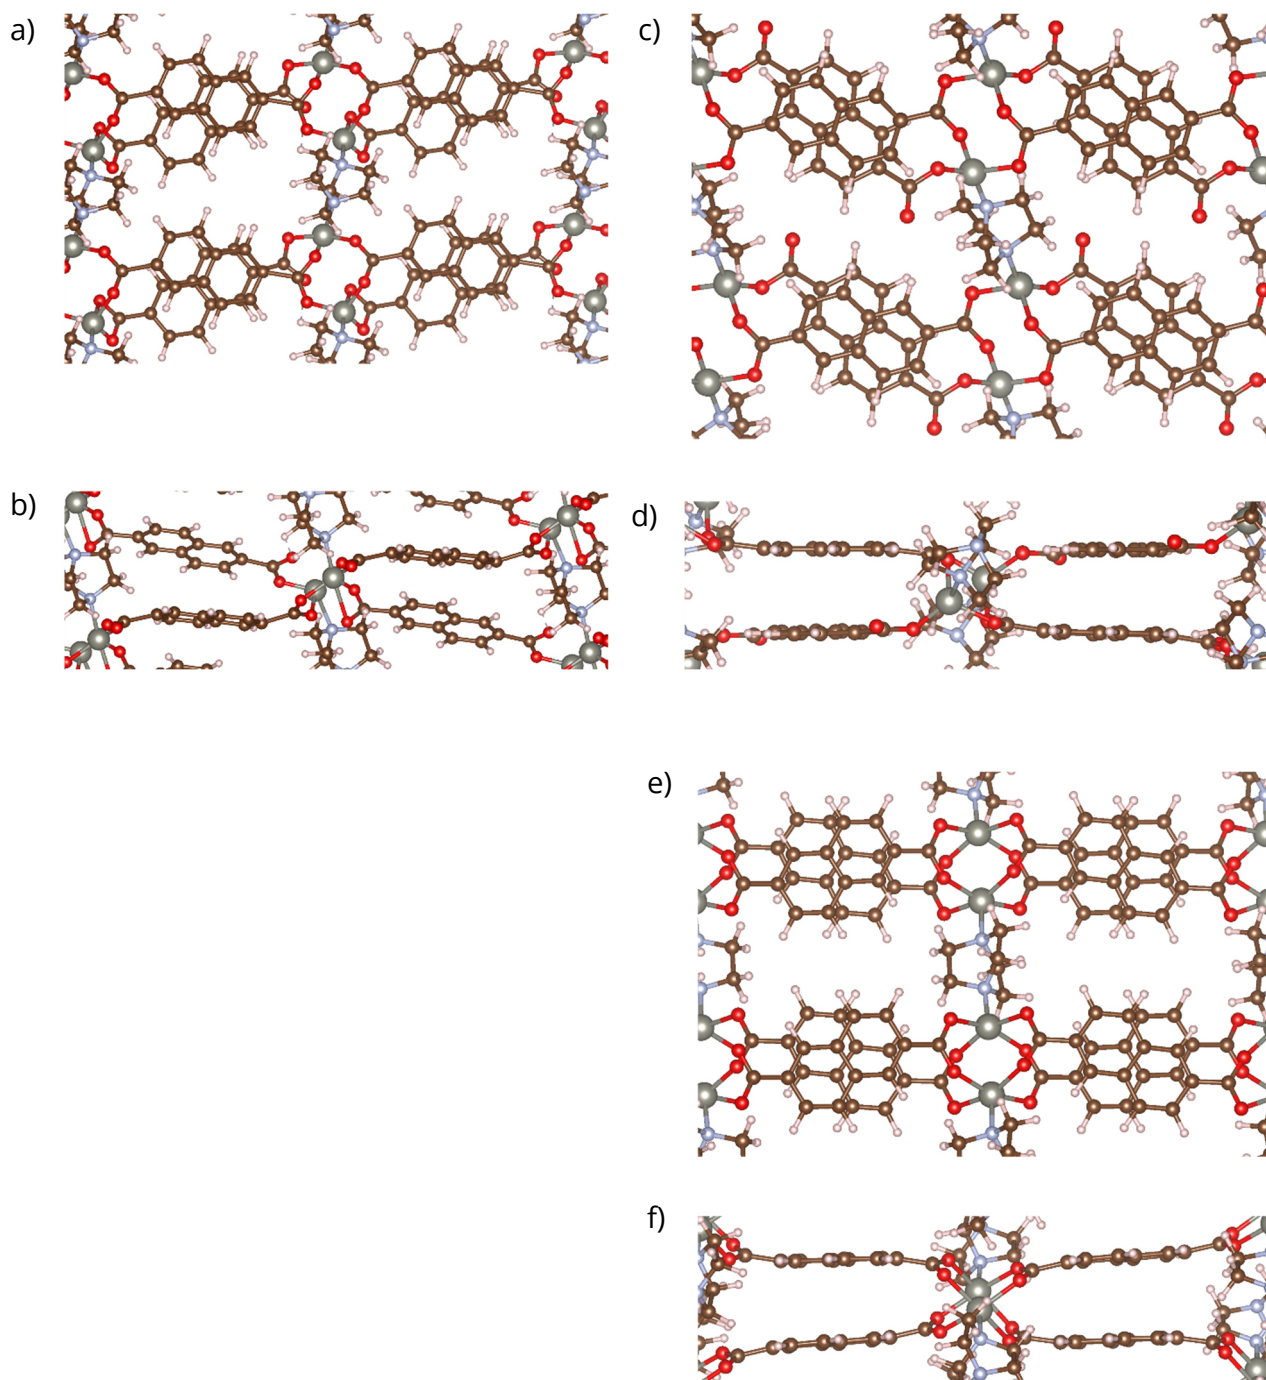

Figure S14: Visualisation of the experimental (a, b) and theoretically optimised (c - f) *cp* phase structure of DUT-8(Zn). (a, c) View on the 1D chain with dabco pillars and paddle wheel unit and the linker stacking. (b, d) View *along* the pore channel. (e, f) Optimised structure with intact paddle wheels.

#### 4. Visualisation of terahertz vibrations in DUT-8(Zn)

##### 4.1. Open pore phase

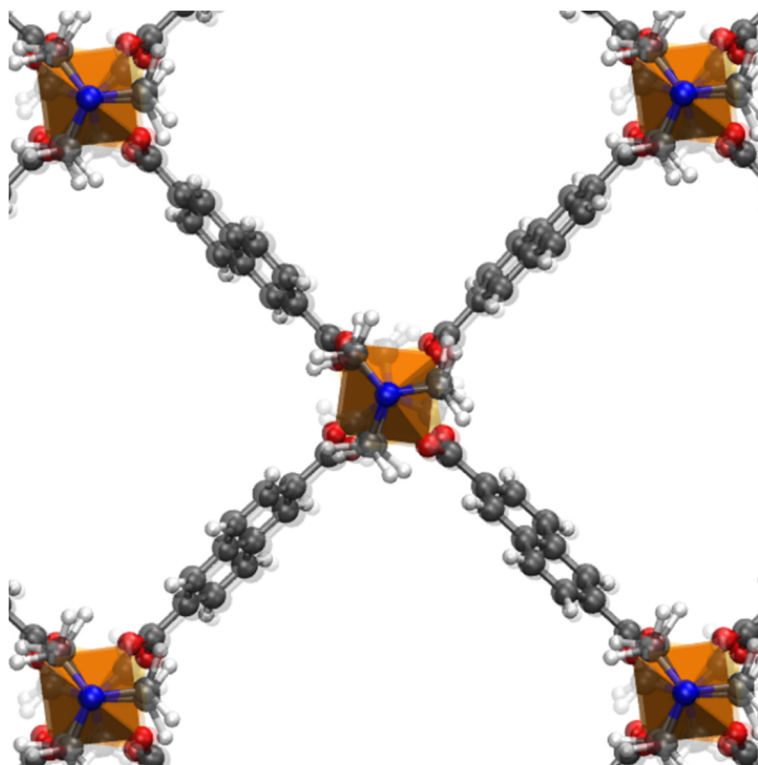

Figure S15: Terahertz vibration at 7  $\text{cm}^{-1}$  in the op phase structure of DUT-8(Zn) inducing rotations of the dabco pillars.

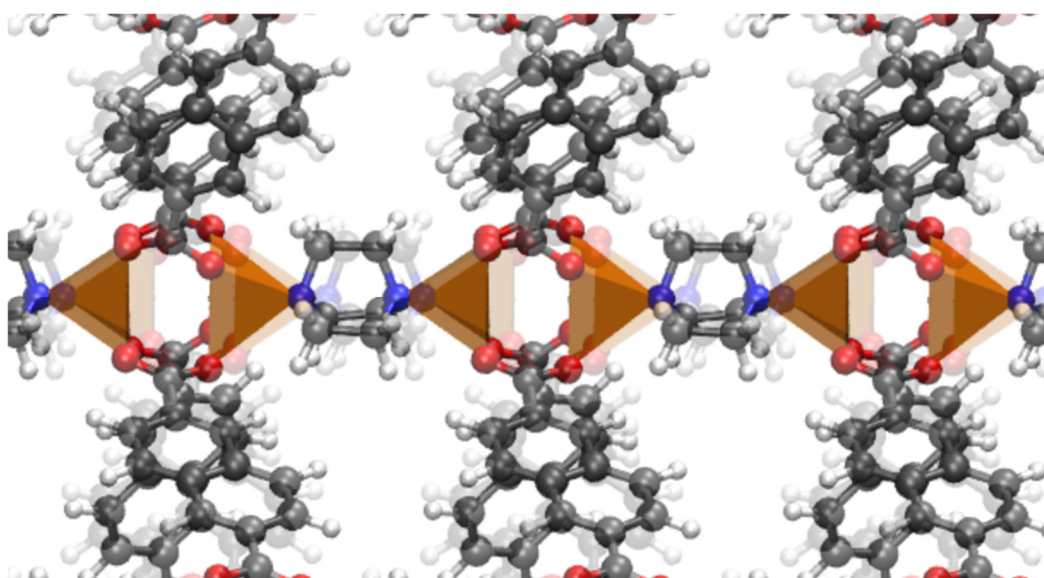

Figure S16: Terahertz vibration at 15  $\text{cm}^{-1}$  in the op phase structure of DUT-8(Zn) inducing translations of the paddle wheel units and the dabco pillars together with rotational movement of the 2,6-ndc linker.



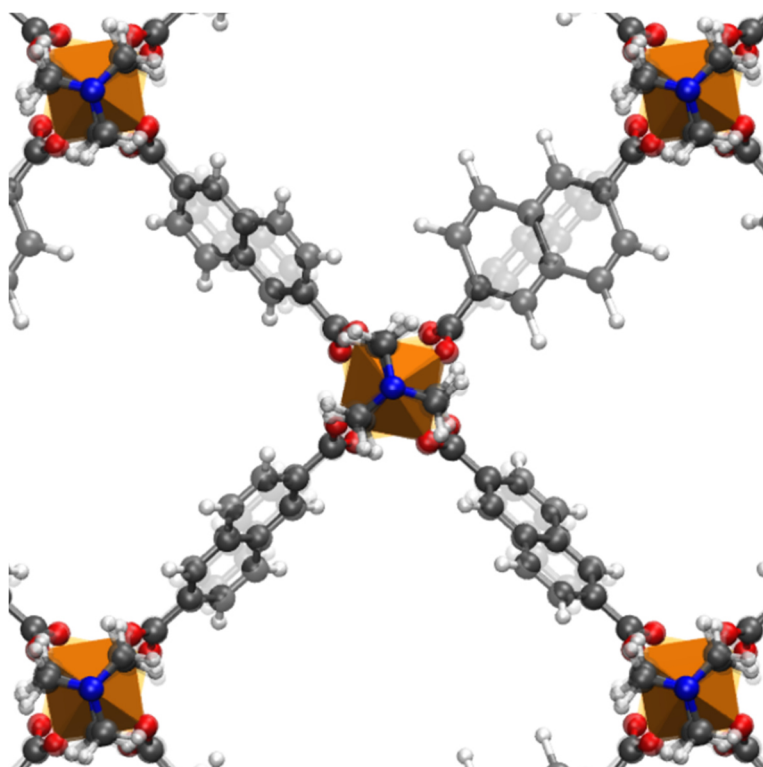

Figure S17: Terahertz vibration at  $21\text{ cm}^{-1}$  in the op phase structure of DUT-8(Zn) inducing rotations of the 2,6-ndc linkers.

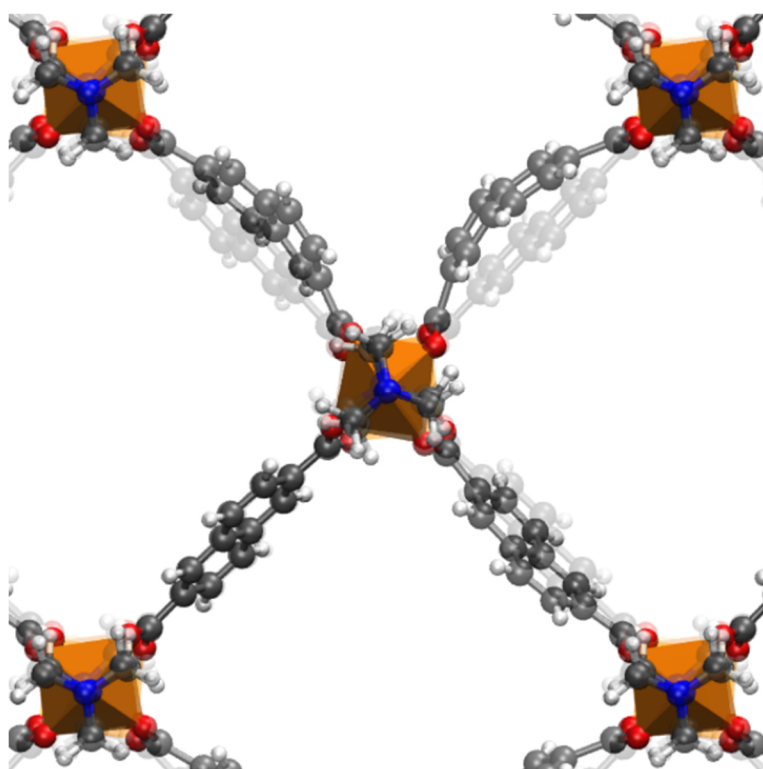

Figure S18: Terahertz vibration at  $34\text{ cm}^{-1}$  in the op phase structure of DUT-8(Zn) inducing translations of the 2,6-ndc linkers (trampoline motion).



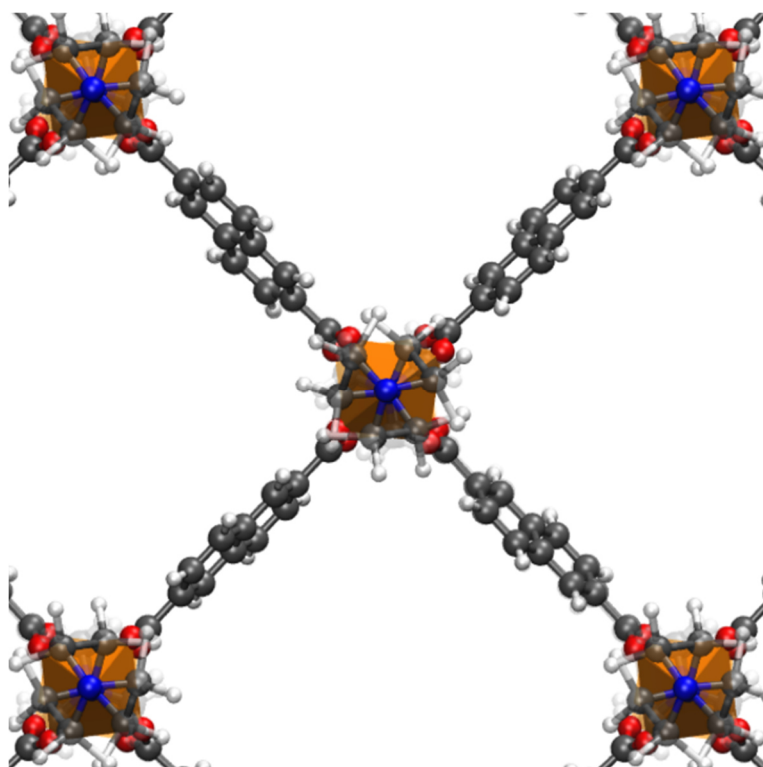

Figure S19: Terahertz vibration at  $72\text{ cm}^{-1}$  in the op phase structure of DUT-8(Zn) inducing distortions of the dabco pillars.

## 4.2. Closed pore phases

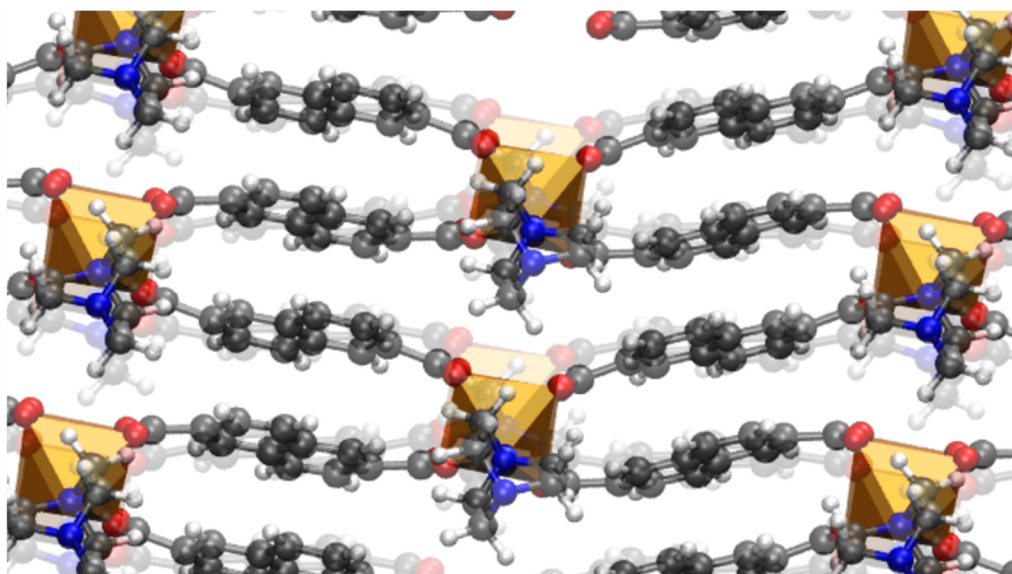

Figure S20: Terahertz vibration at  $16\text{ cm}^{-1}$  in the cp phase structure of DUT-8(Zn) inducing translations of the paddle wheel units and the dabco pillars together with a slight tilting of the 2,6-ndc linkers.

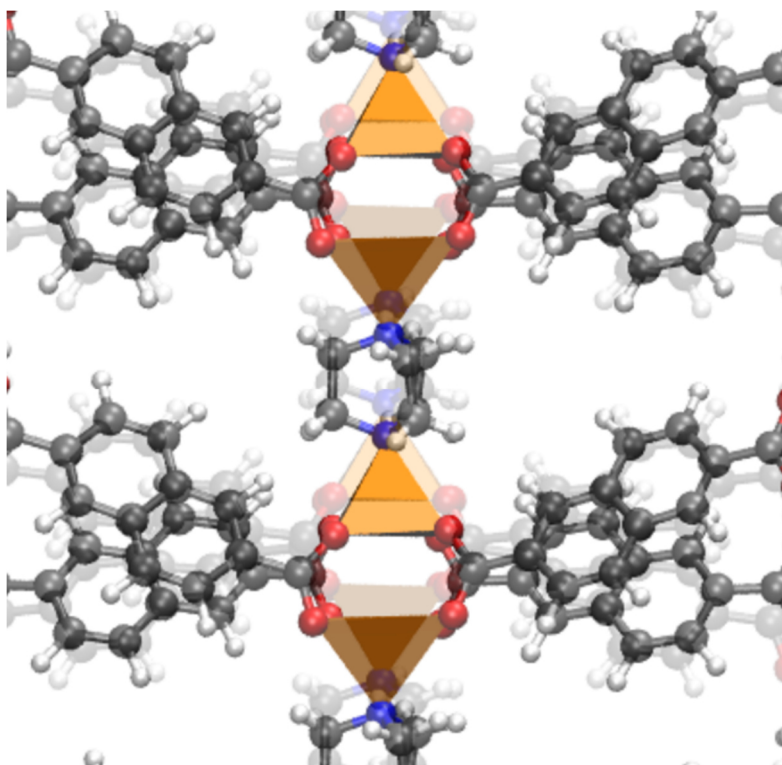

Figure S21: Terahertz vibration at  $32\text{ cm}^{-1}$  in the cp phase structure of DUT-8(Zn) inducing translations of the paddle wheel units and the dabco pillars together with a slight tilting of the 2,6-ndc linkers.

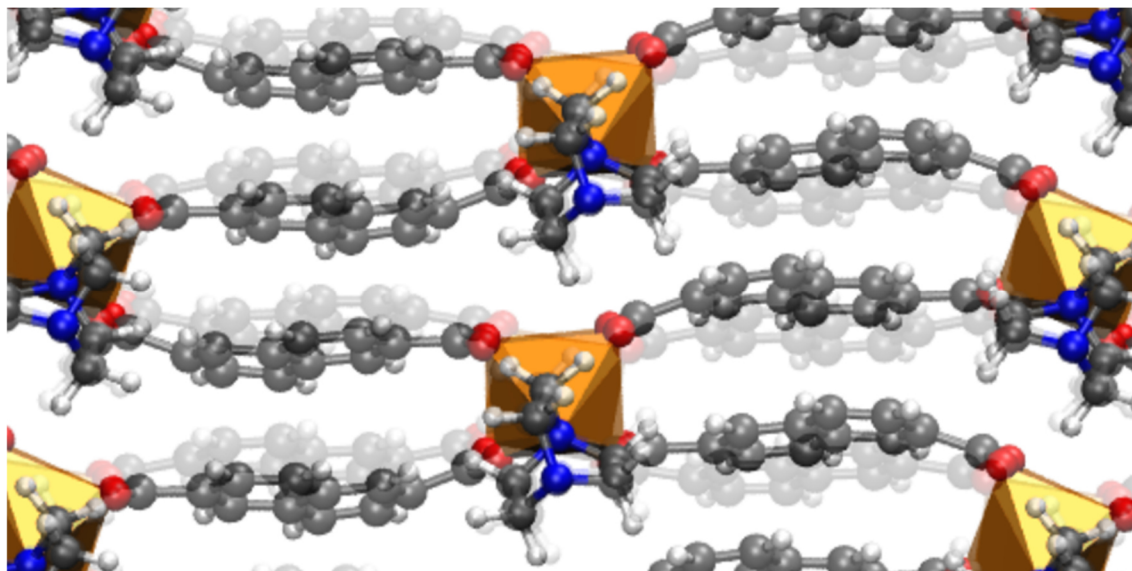

Figure S22: Terahertz vibration at  $25\text{ cm}^{-1}$  in the cp phase structure of DUT-8(Zn) inducing rotations of the paddle wheel units together with translations of the 2,6-ndc linkers.

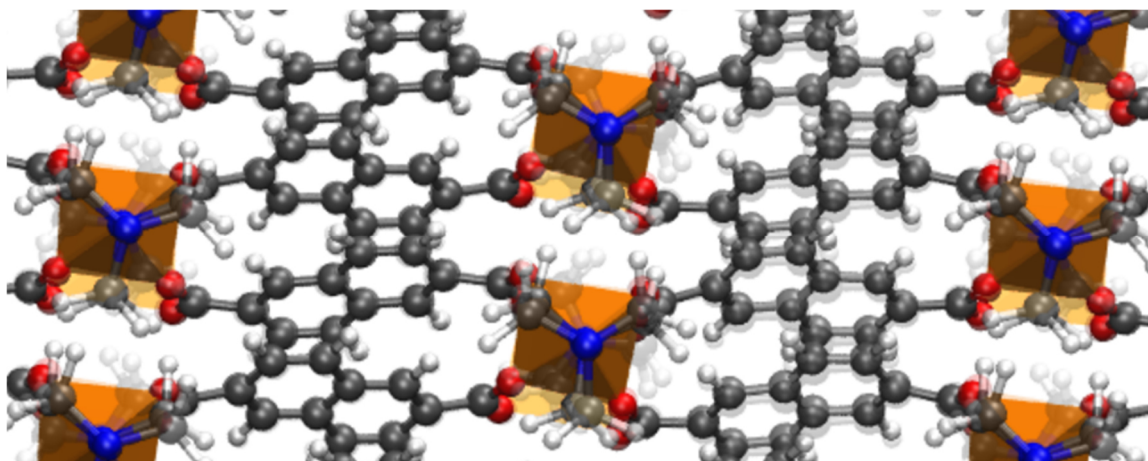

Figure S23: Terahertz vibration at  $37\text{ cm}^{-1}$  in the cp phase structure of DUT-8(Zn) inducing rotations of the dabco pillars.

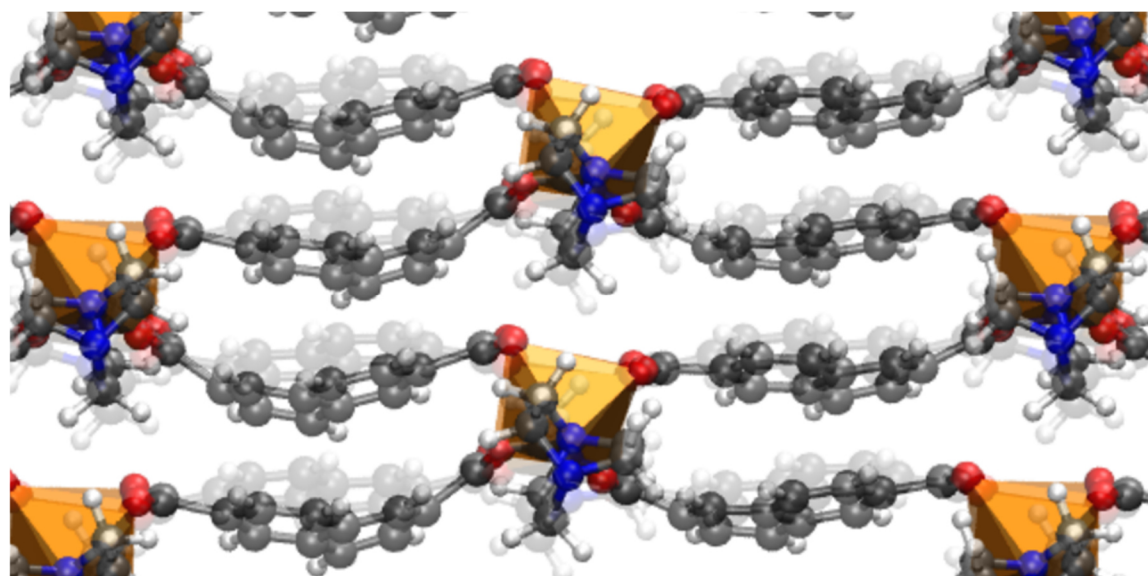

Figure S24: Terahertz vibration at  $47\text{ cm}^{-1}$  in the cp phase structure of DUT-8(Zn) inducing translations of the 2,6-ndc linkers with slight translations of the paddle wheel units and dabco pillars.

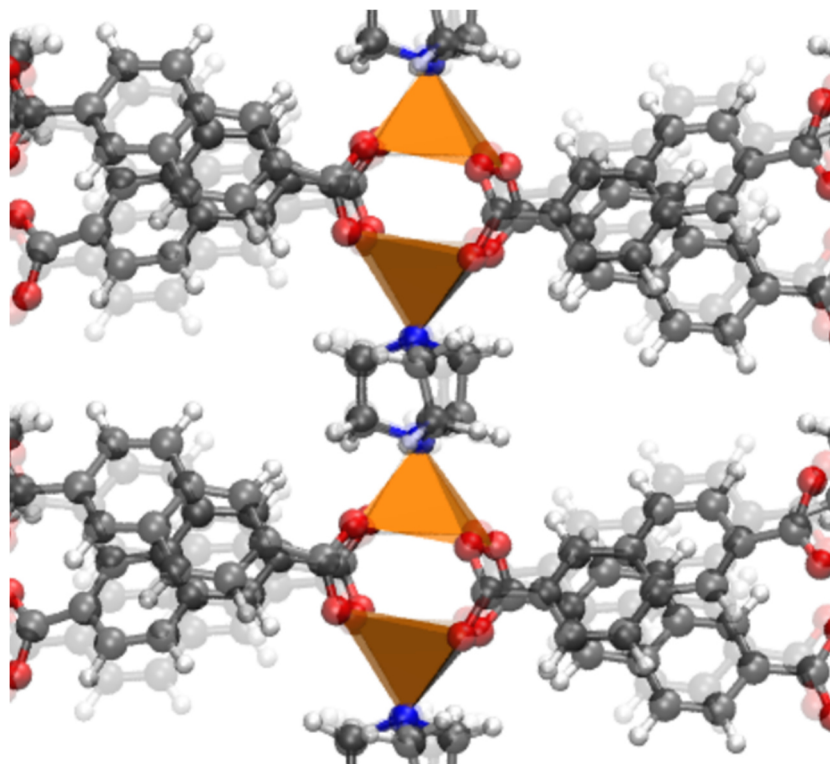

Figure S25: Terahertz vibration at 51  $\text{cm}^{-1}$  in the cp phase structure of DUT-8(Zn) inducing translations of the 2,6-ndc linkers with slight rotations of the paddle wheel units.

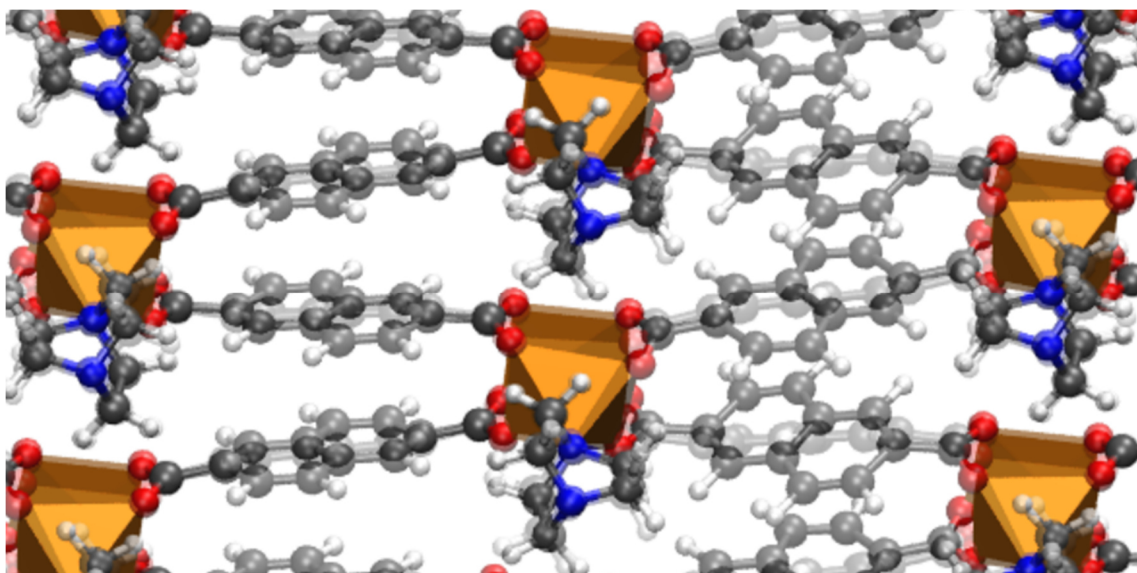

Figure S26: Terahertz vibration at 59  $\text{cm}^{-1}$  in the cp phase structure of DUT-8(Zn) inducing translations of the paddle wheel unit and the dabco pillars together with a slight tilting of the 2,6-ndc linkers.



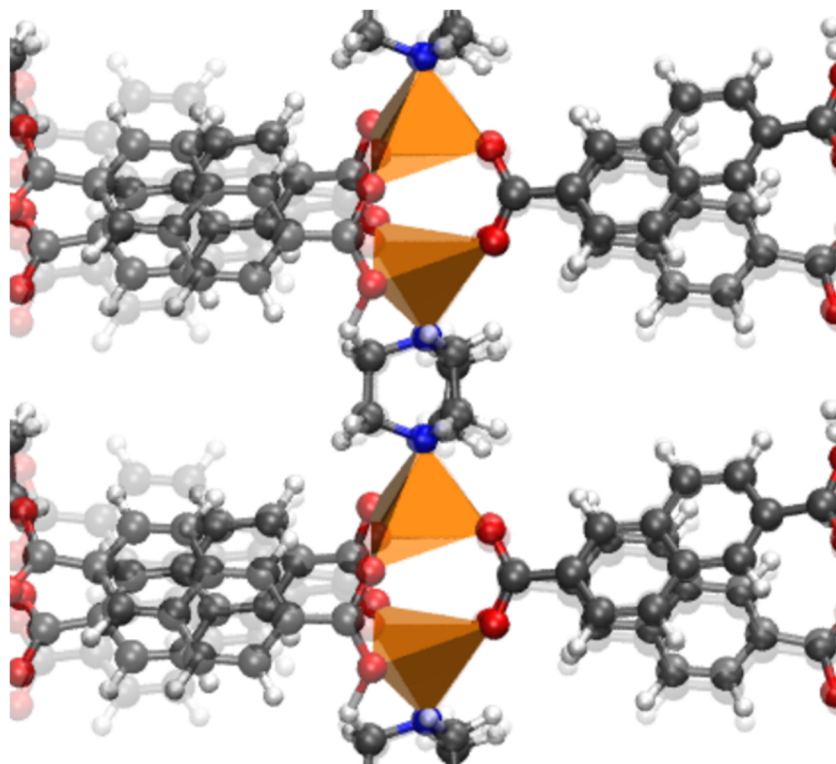

Figure S27: Terahertz vibration at  $60\text{ cm}^{-1}$  in the cp phase structure of DUT-8(Zn) inducing translations of the 2,6-ndc linkers with slight rotations of the paddle wheel units.

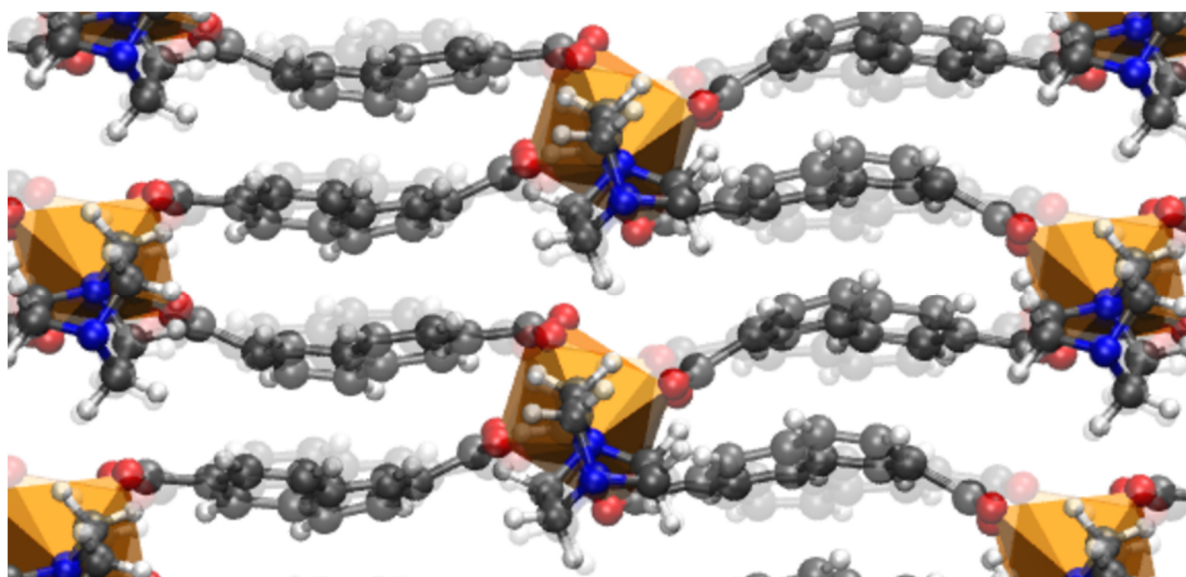

Figure S28: Terahertz vibration at  $71\text{ cm}^{-1}$  in the cp phase structure of DUT-8(Zn) inducing translations of the 2,6-ndc linkers with slight rotations of the paddle wheel units.

## 5. Mode character for terahertz vibrations in DUT-8(M) (M = Ni, Co, Zn, Cu)

### 5.1. Open pore phases

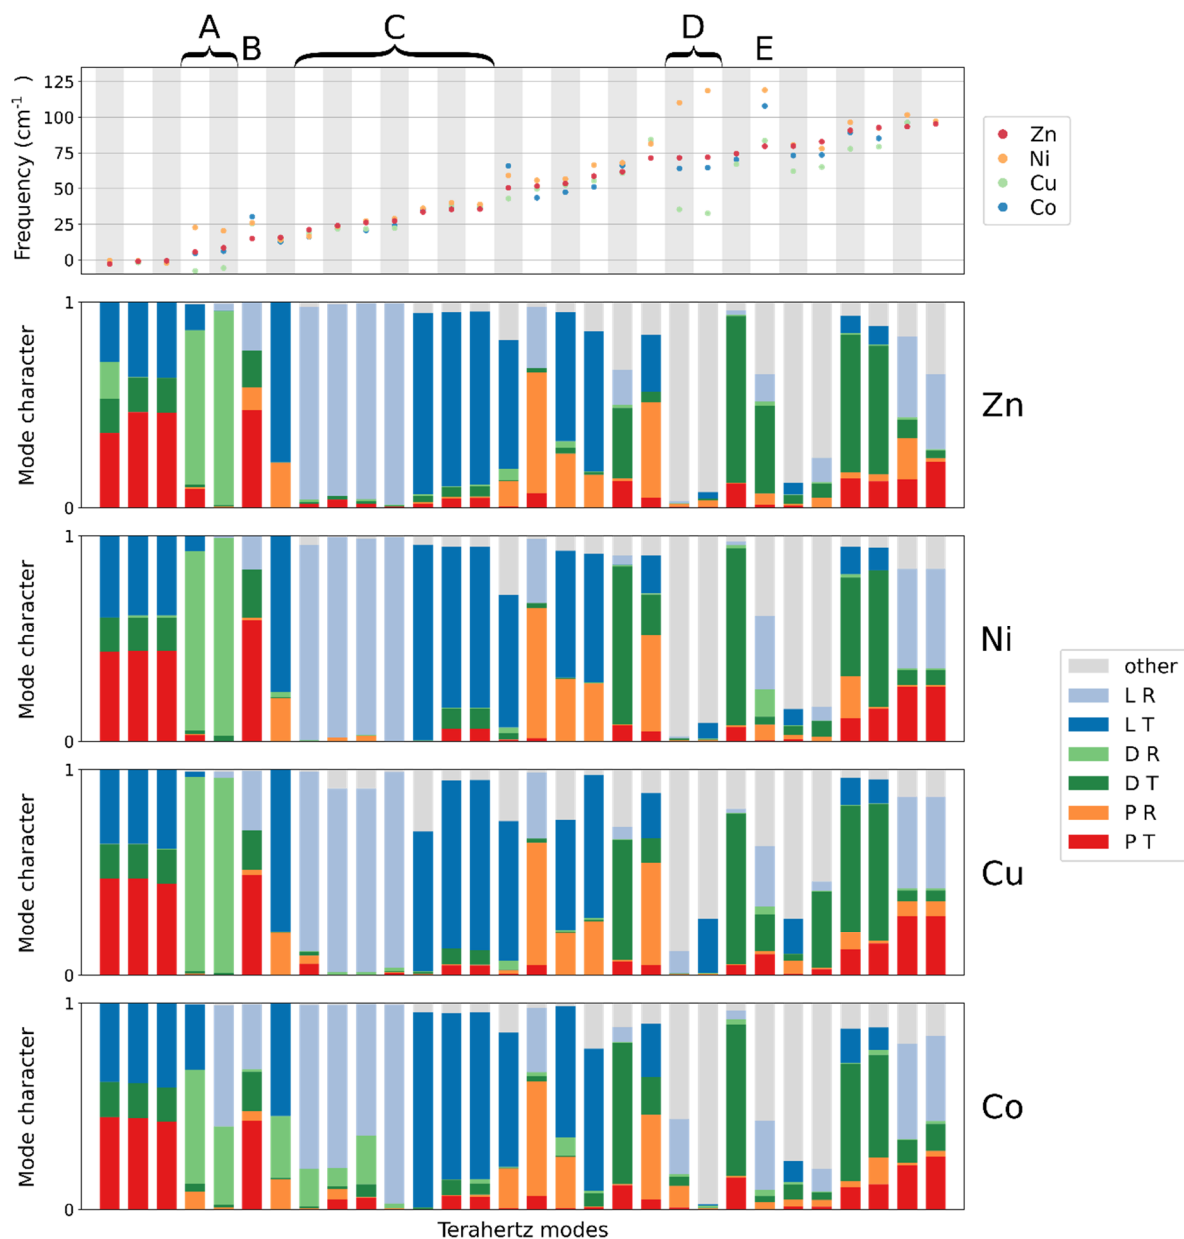

Figure S29: Characterisation of the 30 normal modes with the lowest frequencies of DUT-8(M) (M = Zn, Ni, Cu, Co) materials in their *op* phase. (Top panel) Vibrational frequencies of the different terahertz vibrations. (Bottom panels) Subdivision of the displacements within each terahertz mode in translations (T) and rotations (R) of the 2,6-ndc linker (L), the dabco linker (D), the paddle wheel unit (P), and other types of motions. The normal modes discussed in Section 3.1 are labeled at the top of the figure.

## 5.2. Closed pore phases

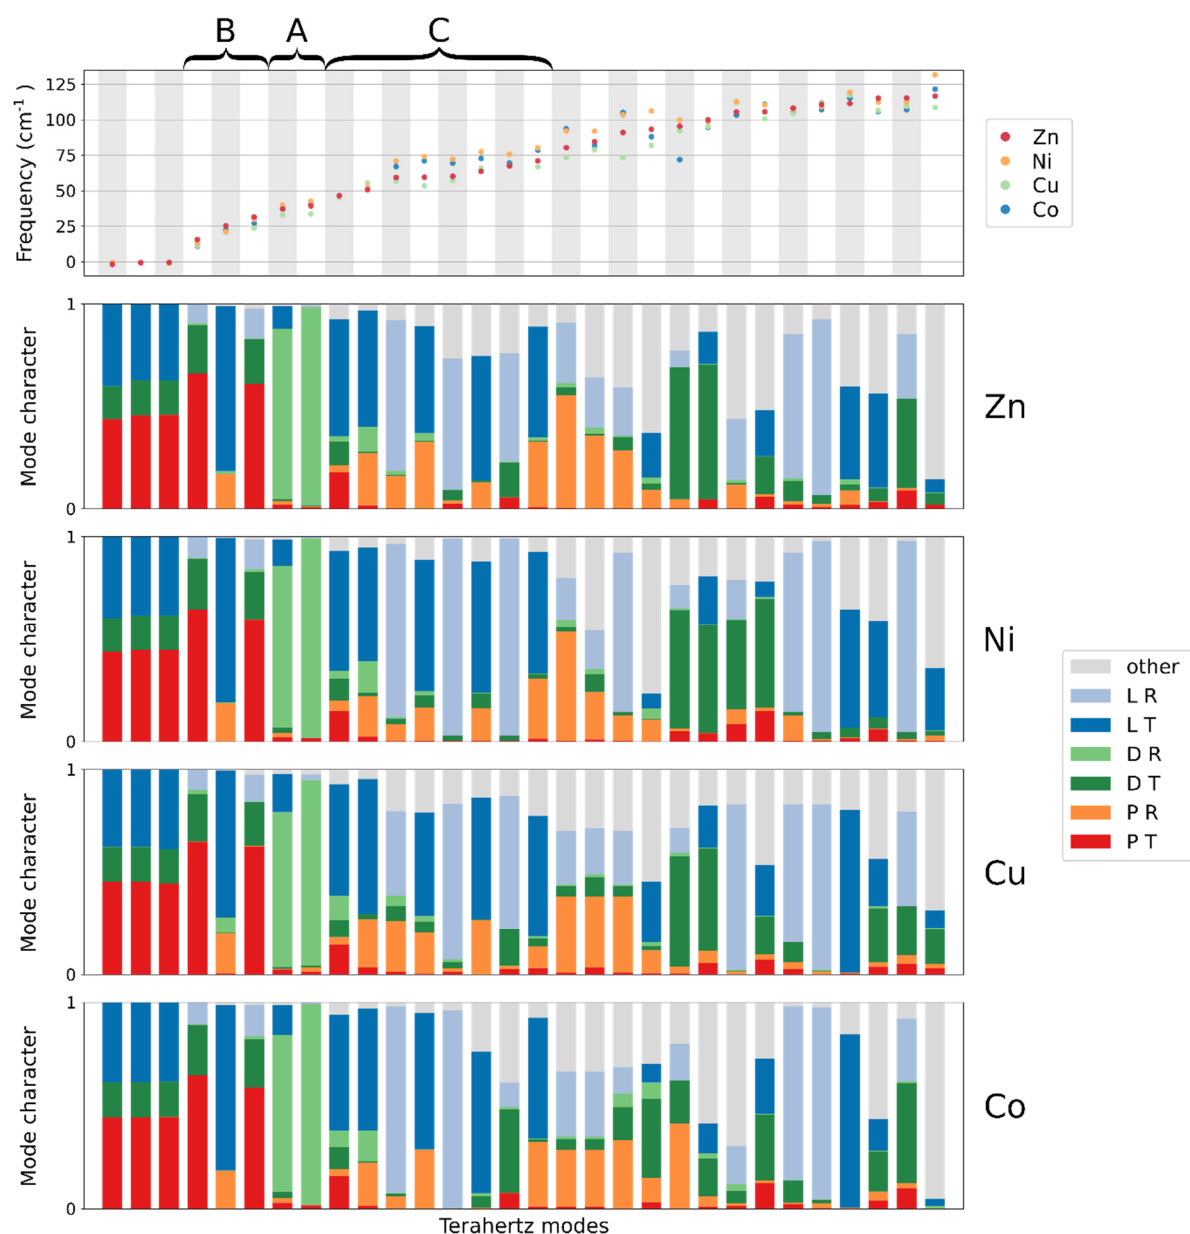

Figure S30: Characterisation of the 30 normal modes with the lowest frequencies of DUT-8(M) (M = Zn, Ni, Cu, Co) materials in their *cp* phase. (Top panel) Vibrational frequencies of the different terahertz vibrations. (Bottom panels) Subdivision of the displacements within each terahertz mode in translations (T) and rotations (R) of the 2,6-ndc linker (L), the dabco linker (D), the paddle wheel unit (P), and other types of motions. The normal modes discussed in Section 3.2 are labeled at the top of the figure.

## 6. Theoretical DUT-8(M) structures with disintegrated paddle wheel unit

### 6.1. Optimisation of the structures

To determine the electronic energy differences between the *cp* phase structures with an intact and disintegrated paddle wheel unit reported in Table S3, equilibrium structures with disintegrated paddle wheel units have to be determined. For DUT-8(Zn) this equilibrium structure was obtained by reducing the unit cell volume to very small values and optimising the structure via a fixed volume optimisation. Due to unfavorable repulsive forces between opposite 2,6-ndc linkers in this dense structure, the 2,6-ndc linkers reorganise themselves to counteract this by spontaneously breaking Zn-O bonds allowing these linkers to rotate more easily and increase the dispersion interactions. Once this optimised DUT-8(Zn) structure with disintegrated paddle wheel unit and low unit cell volume has been created, a new Rose-Vinet fit was constructed to determine the optimal unit cell volume and a final fixed volume optimisation was performed. The obtained equilibrium structure is presented in Figure S31. The *cp* phase structures of the other DUT-8(M) materials with disintegrated paddle wheel units were optimised in the same way, but the disintegrated DUT-8(Zn) structure served as the initial structure.

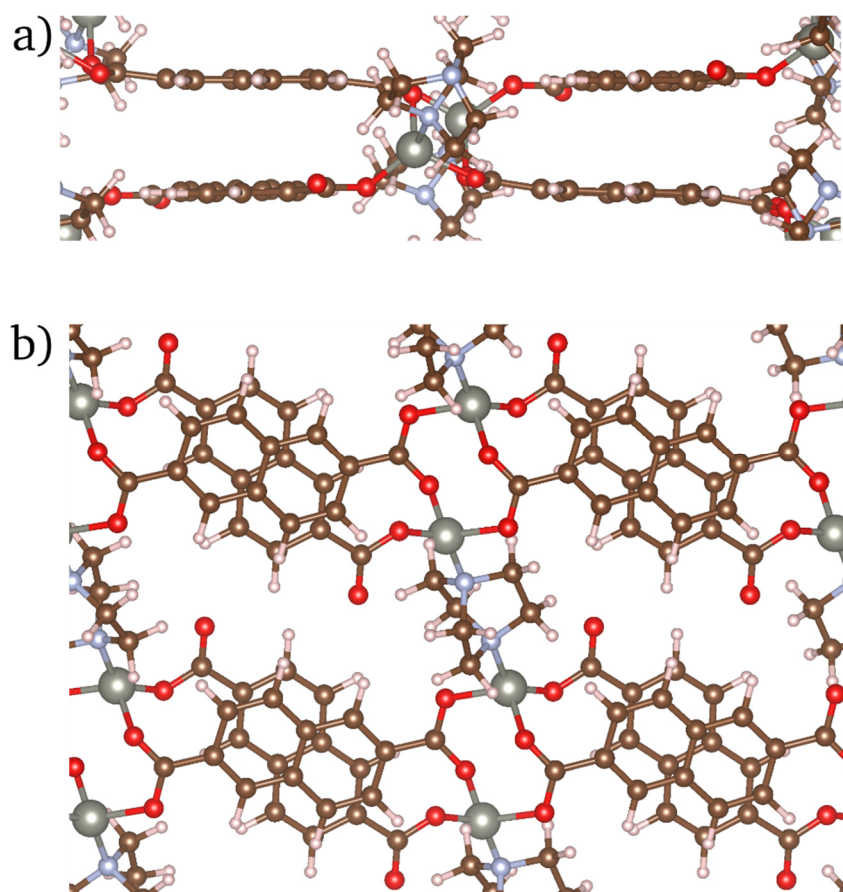

Figure S31: Visualisation of the theoretically optimised *cp* phase structure of DUT-8(Zn) with disintegrated paddle wheel unit. (a) View on the 1D chain with dabco pillars and paddle wheel unit and the linker stacking. (b) View on the pore.



## 6.2. Terahertz vibrations

Table S4: 11 terahertz vibrations with the lowest frequencies of the *cp* phase of DUT-8(Zn) with intact and disintegrated paddle wheel units. The vibrational frequencies of the two structures are presented together with the frequency difference between both (in  $\text{cm}^{-1}$ ).

|         | intact<br>wavenumber ( $\text{cm}^{-1}$ ) | disintegrated                   |                                                |
|---------|-------------------------------------------|---------------------------------|------------------------------------------------|
|         |                                           | wavenumber ( $\text{cm}^{-1}$ ) | $\Delta_{\text{dis-int}}$ ( $\text{cm}^{-1}$ ) |
| mode 4  | 15.7                                      | 16.2                            | +0.5                                           |
| mode 5  | 25.3                                      | 15.9                            | -9.4                                           |
| mode 6  | 31.7                                      | 33.3                            | +1.6                                           |
| mode 7  | 37.2                                      | 22.8                            | -14.4                                          |
| mode 8  | 39.4                                      | 25.0                            | -14.4                                          |
| mode 9  | 46.7                                      | 36.3                            | -10.4                                          |
| mode 10 | 50.8                                      | 40.4                            | -10.4                                          |
| mode 11 | 59.4                                      | 43.5                            | -15.9                                          |
| mode 12 | 59.6                                      | 49.0                            | -10.6                                          |
| mode 13 | 60.3                                      | 51.8                            | -8.5                                           |
| mode 14 | 63.7                                      | 51.5                            | -12.2                                          |

## 7. Raman active modes in DUT-8(Ni)

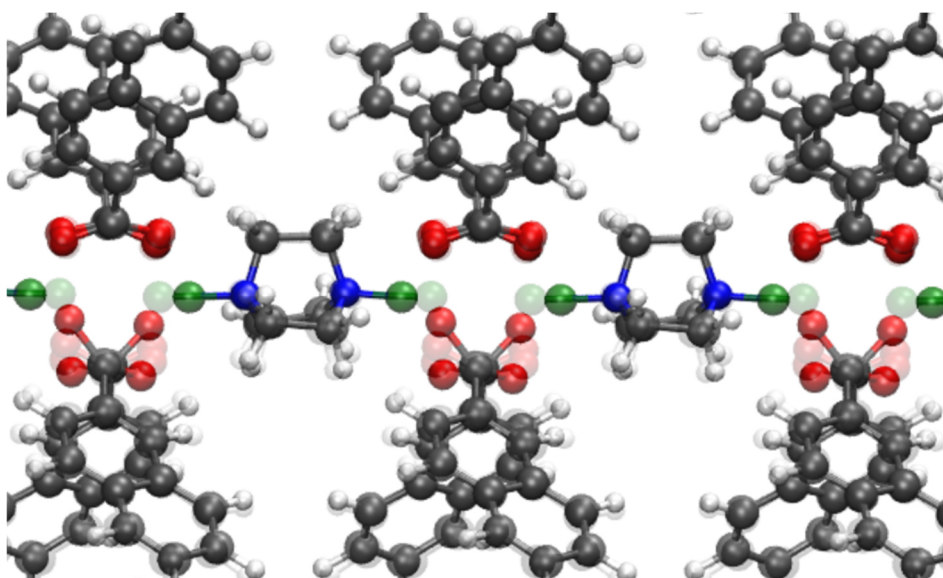

Figure S32: Raman active vibration at  $196 \text{ cm}^{-1}$  in the *op* phase structure of DUT-8(Ni) inducing stretching of the Ni-N bond.

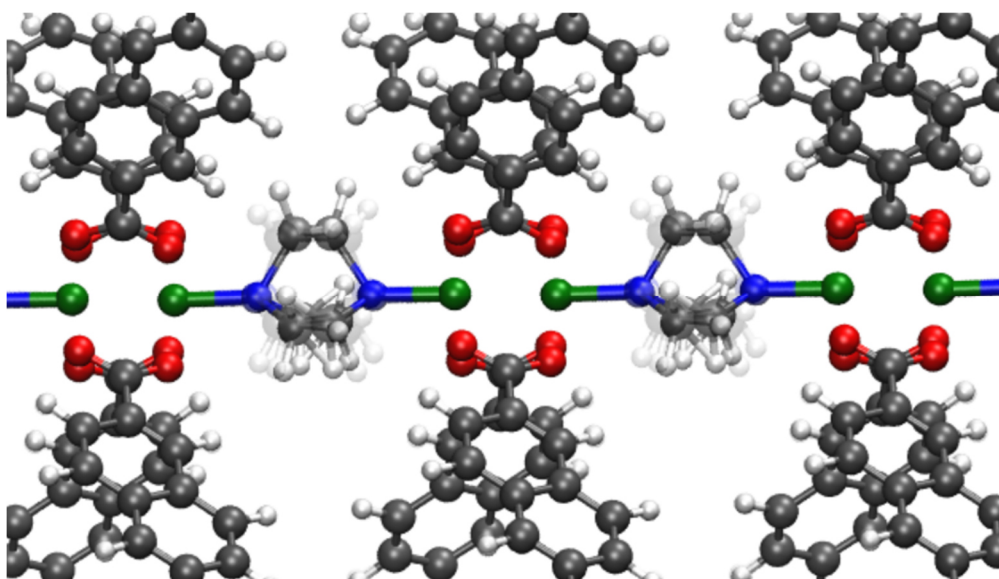

Figure S33: Raman active vibration at 977  $\text{cm}^{-1}$  in the *op* phase structure of DUT-8(Ni) inducing stretching of the C-C bonds in the dabco pillar.

## 8. Intact paddle wheel structures of DUT-8(M) materials

### 8.1. Open pore phases

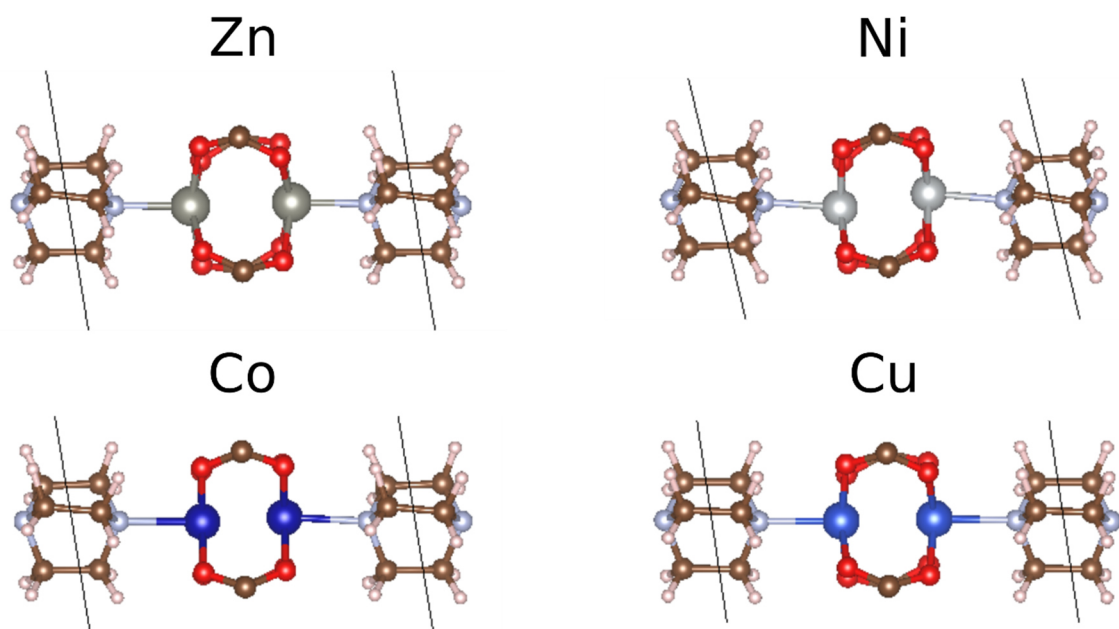

Figure S34: Visualisation of the paddle wheel unit of the theoretically optimised *op* phase structures of DUT-8(M) (M = Zn, Ni, Co, Cu) materials.

## 8.2. Closed pore phases

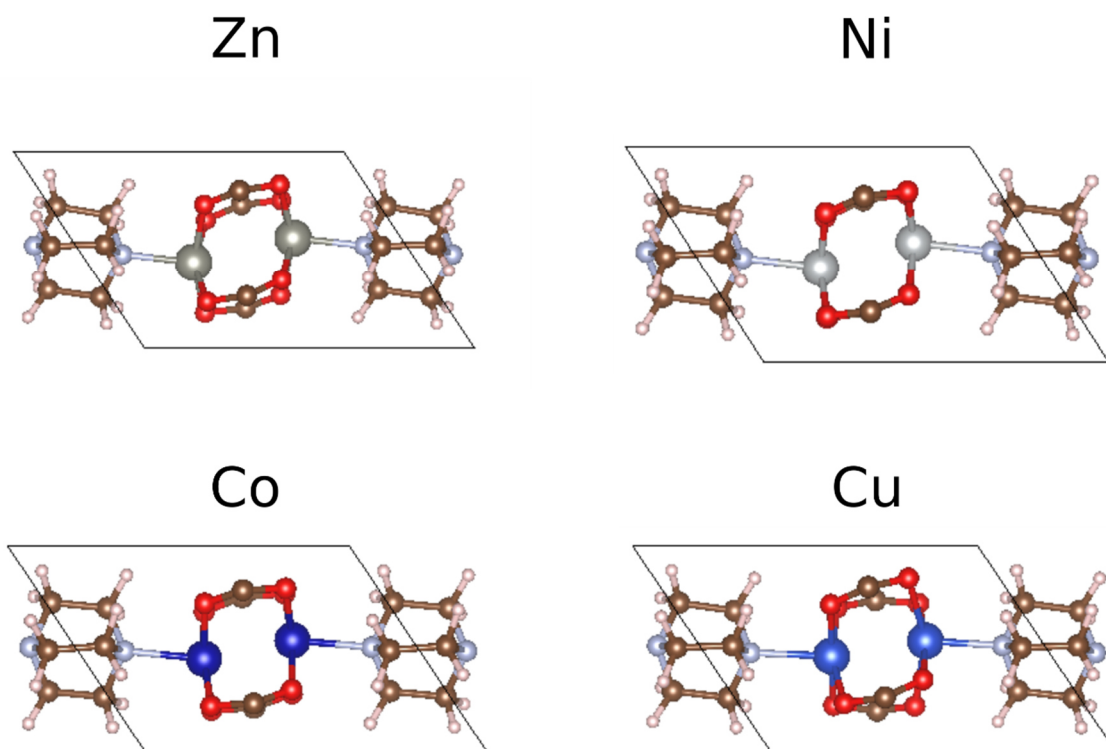

Figure S35: Visualisation of the paddle wheel unit of the theoretically optimised *cp* phase structures of DUT-8(M) (M = Zn, Ni, Co, Cu) materials.

## 9. Consideration of anharmonicities

As the performed phonon calculations rely on the harmonic approximation, the predicted frequencies may indeed be affected by anharmonicities. These can be taken into account by also considering third- and higher-order derivatives of the energy with respect to the atom displacements. However, this significantly increases the computational cost, which becomes unfeasible for the studied DUT-8 systems. To estimate the anharmonicity of the phonon modes, we have instead calculated their anharmonic frequencies in an approximate way for the *op* and *cp* phases of DUT-8(Ni). For each of the 30 phonon modes with the lowest frequencies, we have distorted the equilibrium structure along the harmonically predicted phonon mode by 5 positive and 5 negative displacement amplitudes and calculated the corresponding energy. Afterwards, a 7<sup>th</sup> order polynomial fit was determined for the potential energy along this specific phonon mode. Subsequently, the Schrödinger equation of the phonon mode was solved numerically and the anharmonic frequency was identified as the energy difference between the two lowest eigenstates divided by Planck's constant. In this way, the anharmonic frequency of a harmonic phonon mode can be determined. Although, this approach neglects the possibility of phonon coupling. For the *op* phase of DUT-8(Ni), the resulting anharmonic frequencies are compared with the harmonic ones in Figure S36. The latter figure also illustrates the two first eigenstates of the Schrödinger equation of two specific modes.

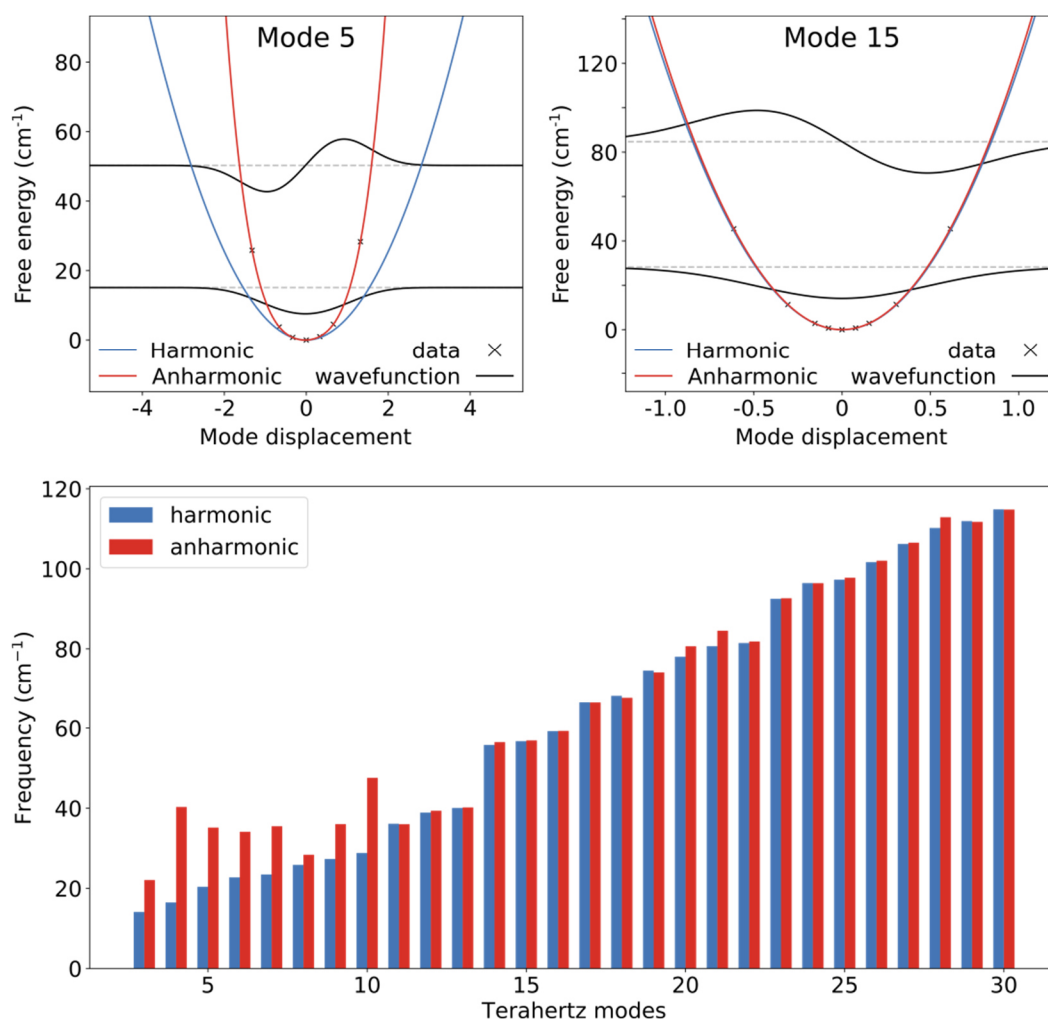

Figure S36. Comparison of the harmonic and anharmonic frequencies of the 30 phonon modes with the lowest frequencies for the op phase of DUT-8(Ni). For modes 5 and 15 the harmonic free energy is compared with the anharmonic free energy and its corresponding eigenstates.

The 3 modes inducing translations of the complete structure (modes 0 to 2) have not been considered. For the phonon modes with the lowest frequencies (modes 3 to 10), the largest differences between the harmonic and anharmonic frequencies can be observed. These modes either involve dabco rotations (modes 3 and 4), a combination of paddle-wheel translations and linker rotations (mode 5), a combination of linker translations and paddle-wheel rotations (mode 6), or rotations of the 2,6-ndc linker (modes 7 to 10). These modes are thus highly anharmonic in the op phase. Interestingly, the anharmonic frequency of these modes is higher than the harmonic one making them less soft. For the phonon modes with higher frequencies, there is only a low level of anharmonicity as shown by anharmonic frequencies which are almost identical to the harmonic ones. Similarly for the cp phase of DUT-8(Ni), the harmonic and anharmonic frequencies of the low-frequency phonon modes are compared in Figure S37.

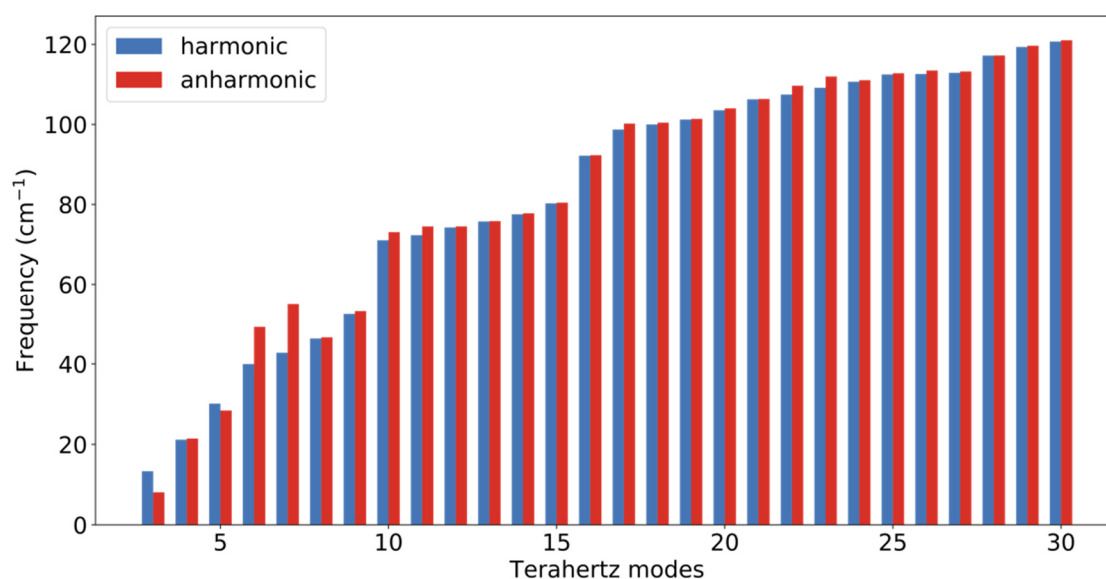

Figure S37. Comparison of the harmonic and anharmonic frequencies of the 30 phonon modes with the lowest frequencies for the cp phase of DUT-8(Ni).

For the cp phase, there are only three phonon modes exhibiting slight anharmonicity. The phonon mode with the lowest frequency inducing a combination of paddle-wheel translations and linker rotations (mode 3) has an anharmonic frequency that is lower than the harmonic one, making it softer. The phonon modes inducing dabco rotations (modes 6 and 7) have an anharmonic frequency which is higher than the harmonic one, similar to what was observed in the op phase.
